# Supplementary material
Source: PubMed Central journal article supplement (PMC3136311)
Supplement: 1101595108_sd01.pdf [file 1101595108_sd01.pdf]

# 1 - Abe 2007

Bacteria

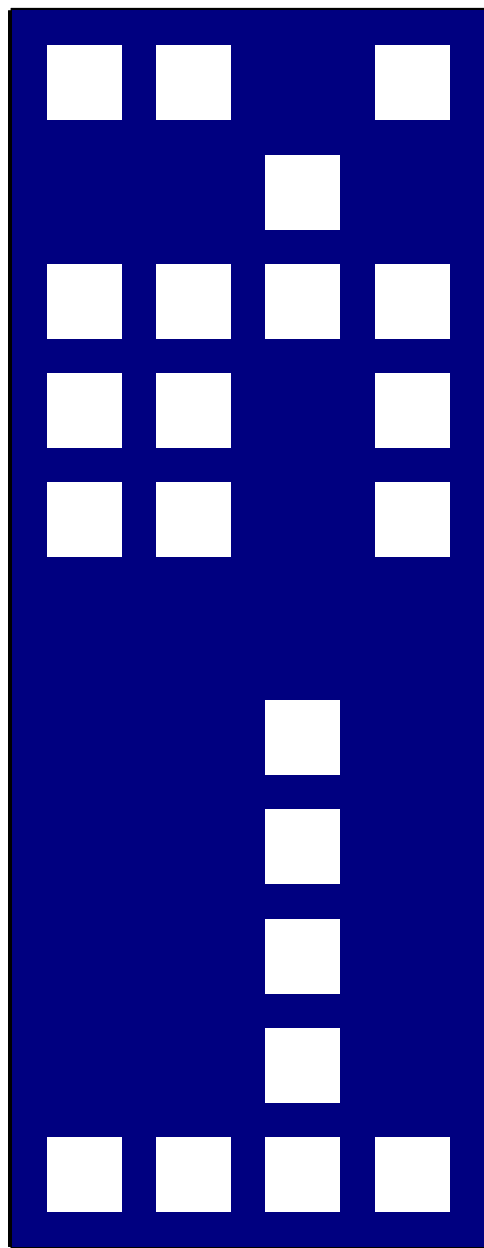

Phages

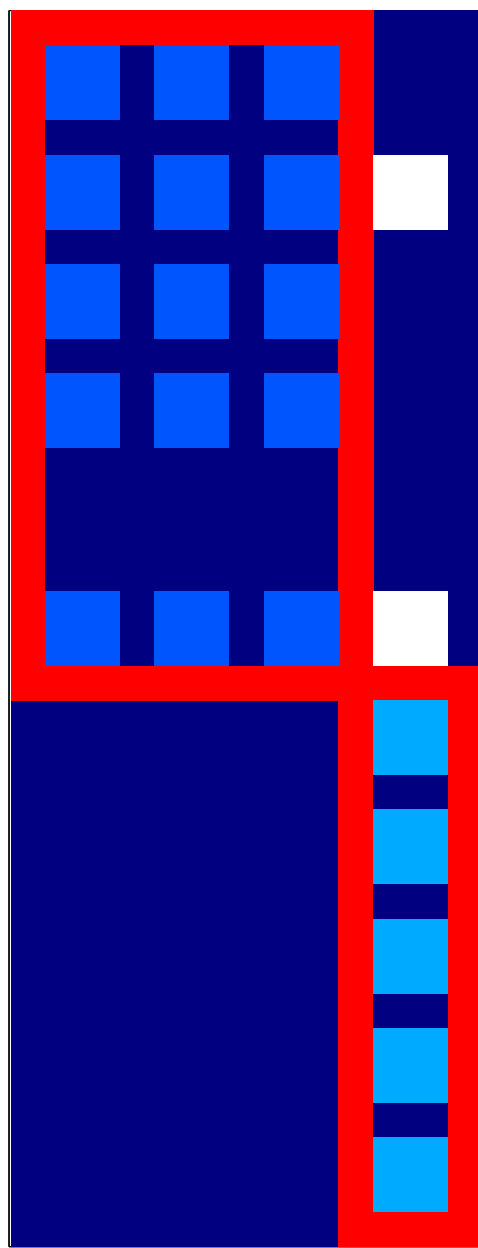

$Q = 0.31$

$z_Q = 1.18$

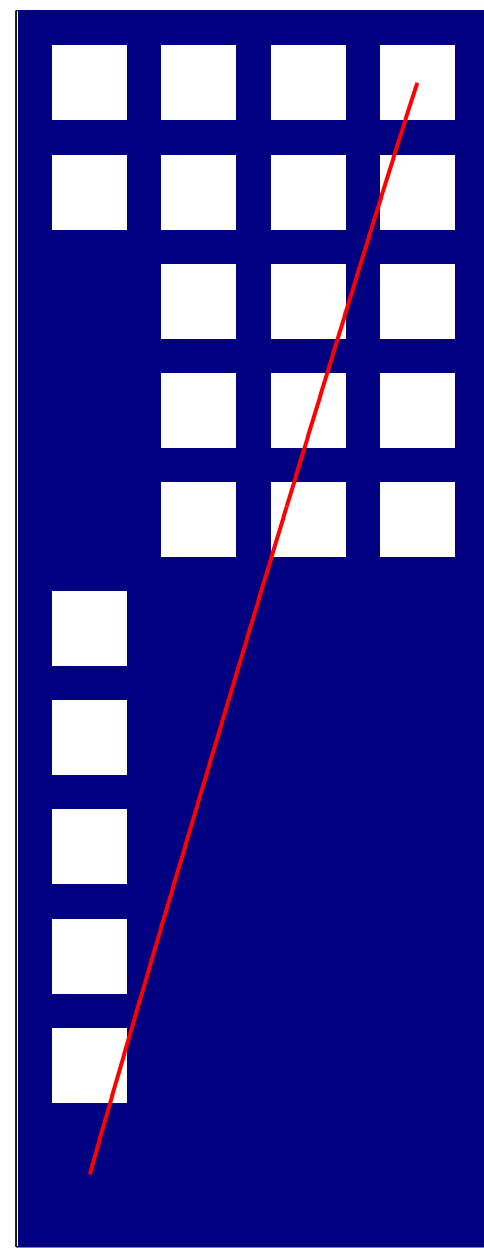

$N = 0.65$

$z_N = -0.16$

## 2 - Barrangou 2002

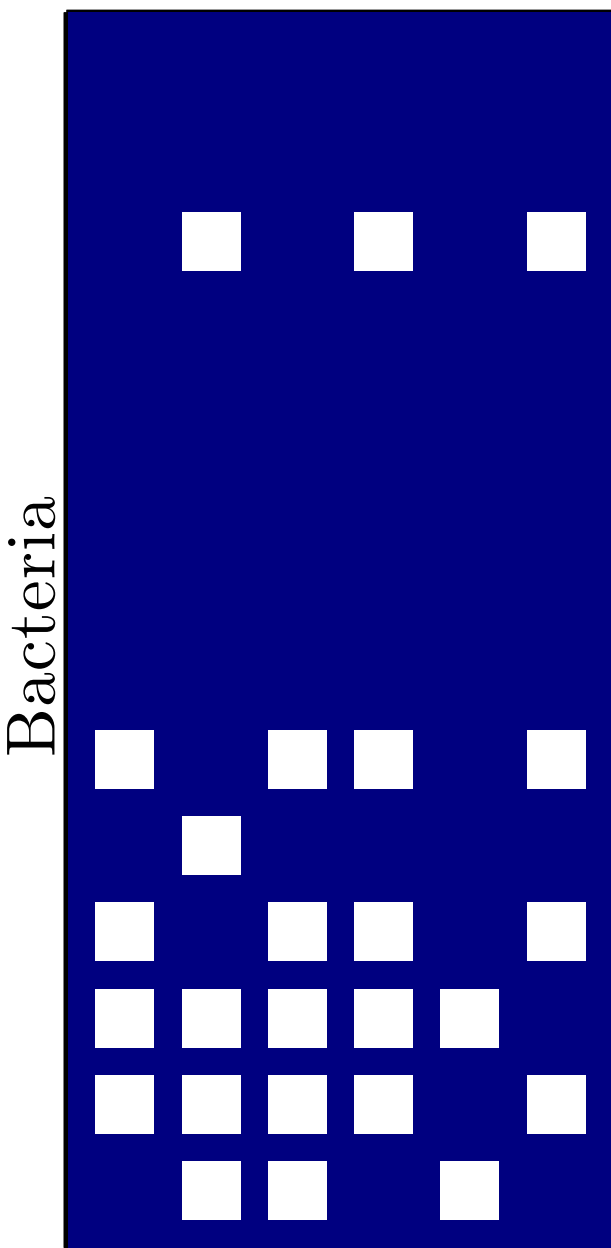

Phages

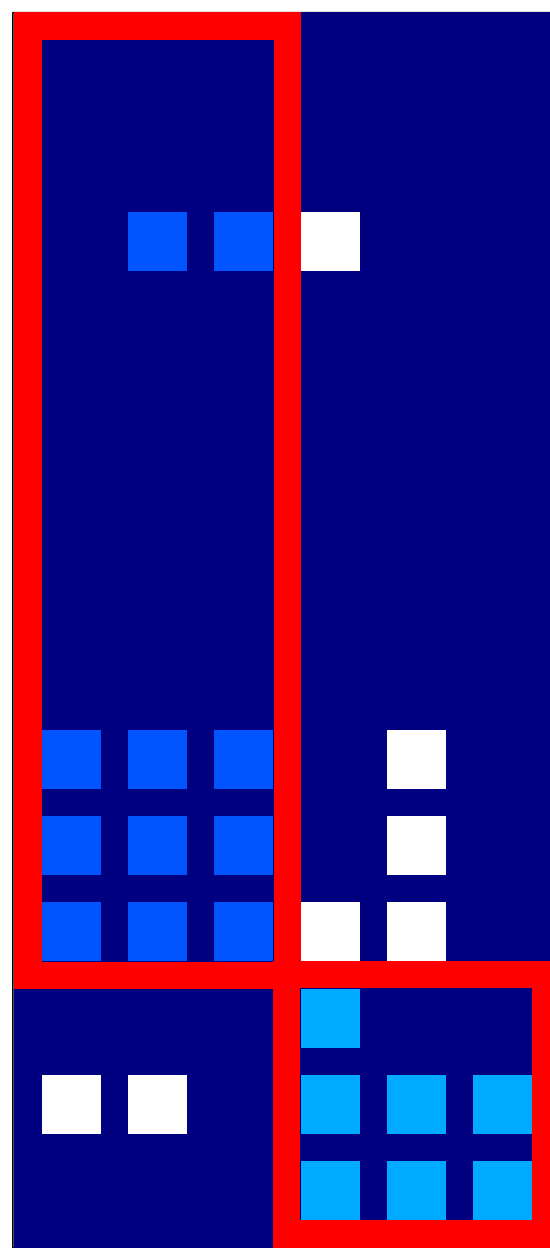

$$Q = 0.21$$

$$z_Q = -4.92$$

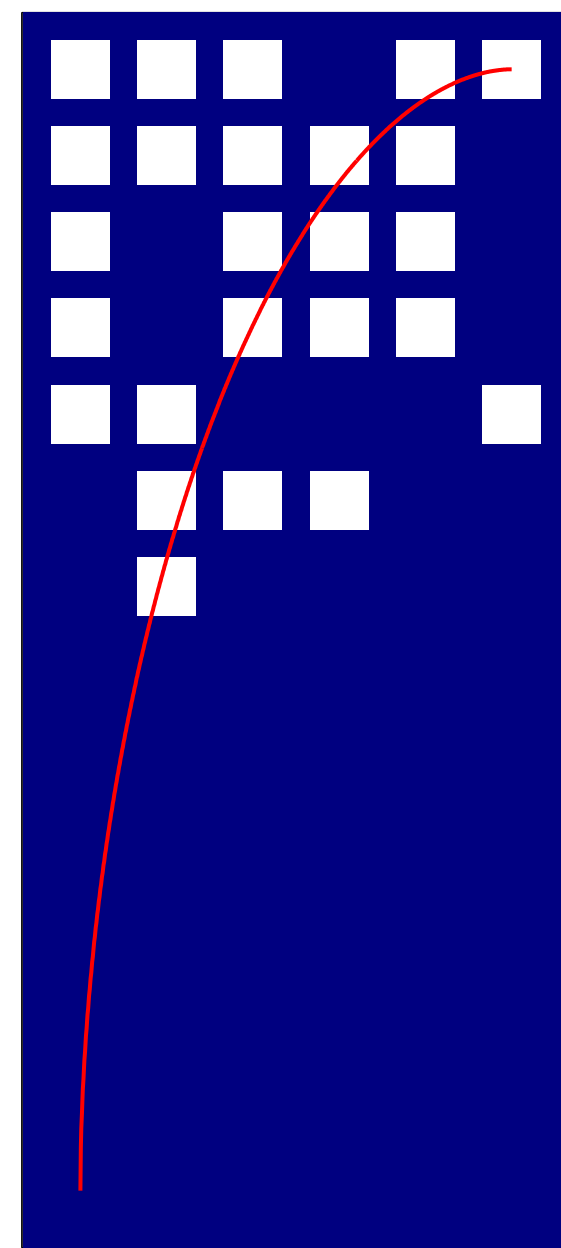

$$N = 0.81$$

$$z_N = 1.31$$

# 3 - Braun-Breton 1981

Bacteria

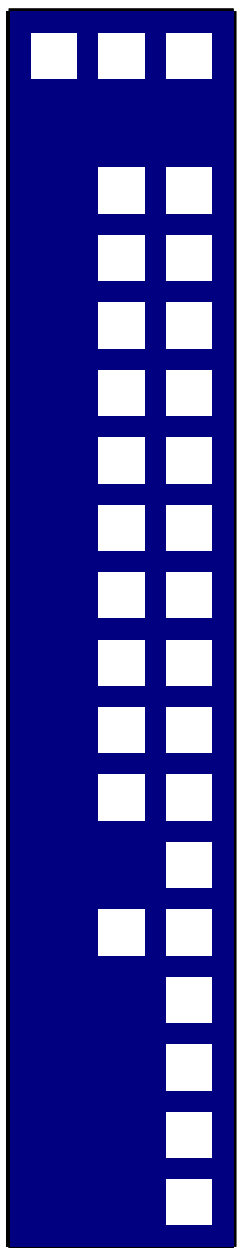

Phages

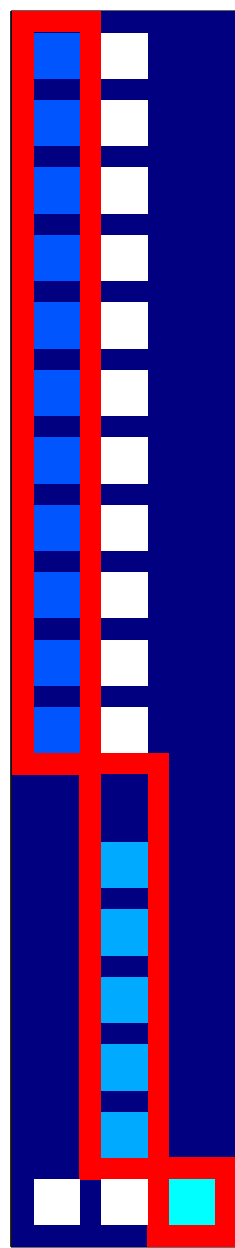

$$Q = 0.18$$

$$z_Q = -2.32$$

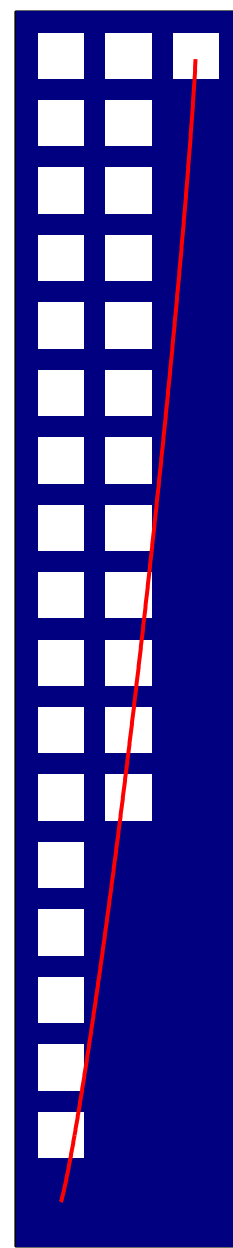

$$N = 1$$

$$z_N = 4.44$$

# 4 - Campbell 1995

Bacteria

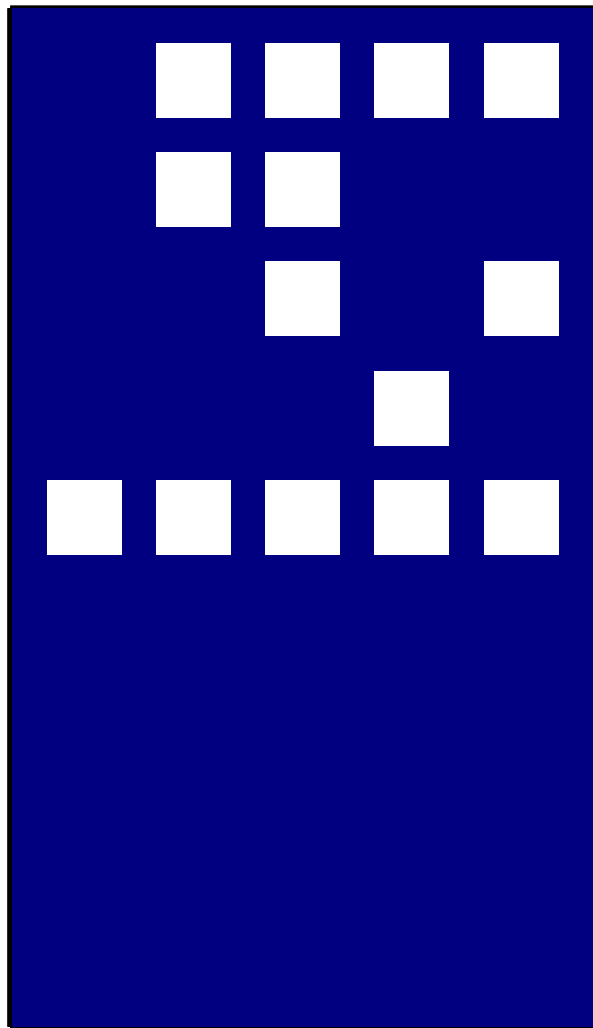

Phages

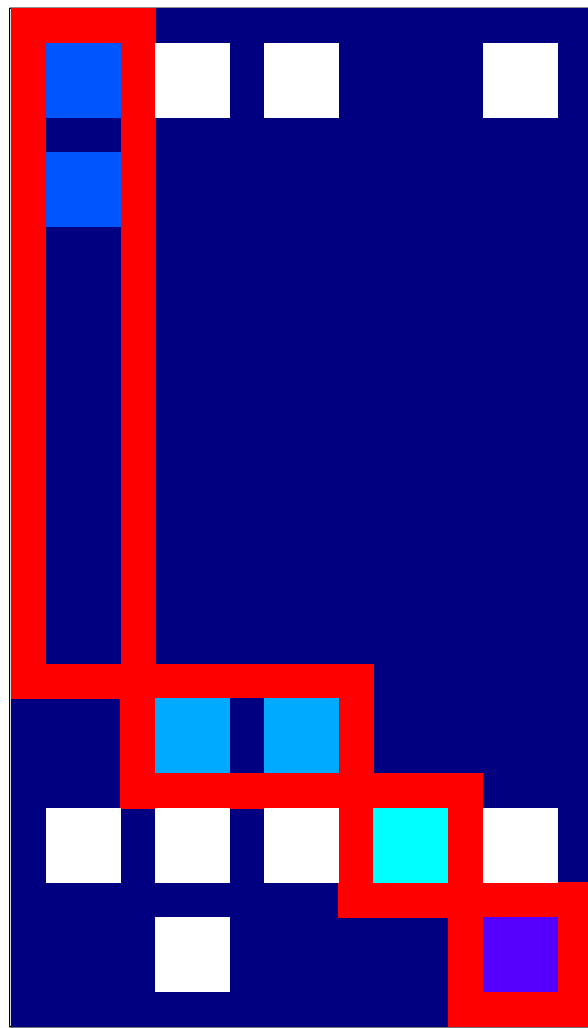

$$Q = 0.22$$

$$z_Q = -3.23$$

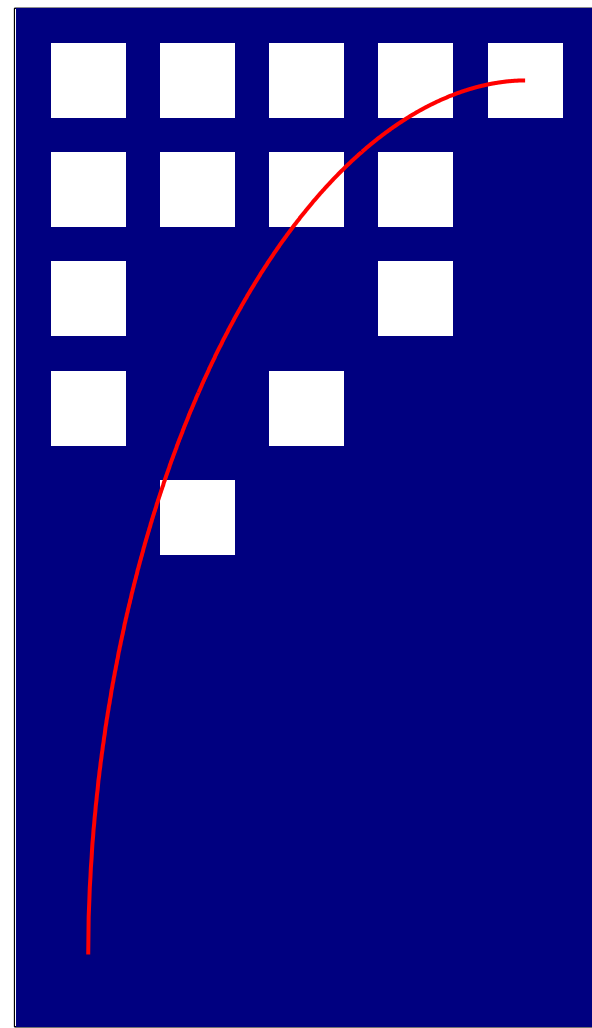

$$N = 0.94$$

$$z_N = 1.67$$

# 5 - Capparelli 2010

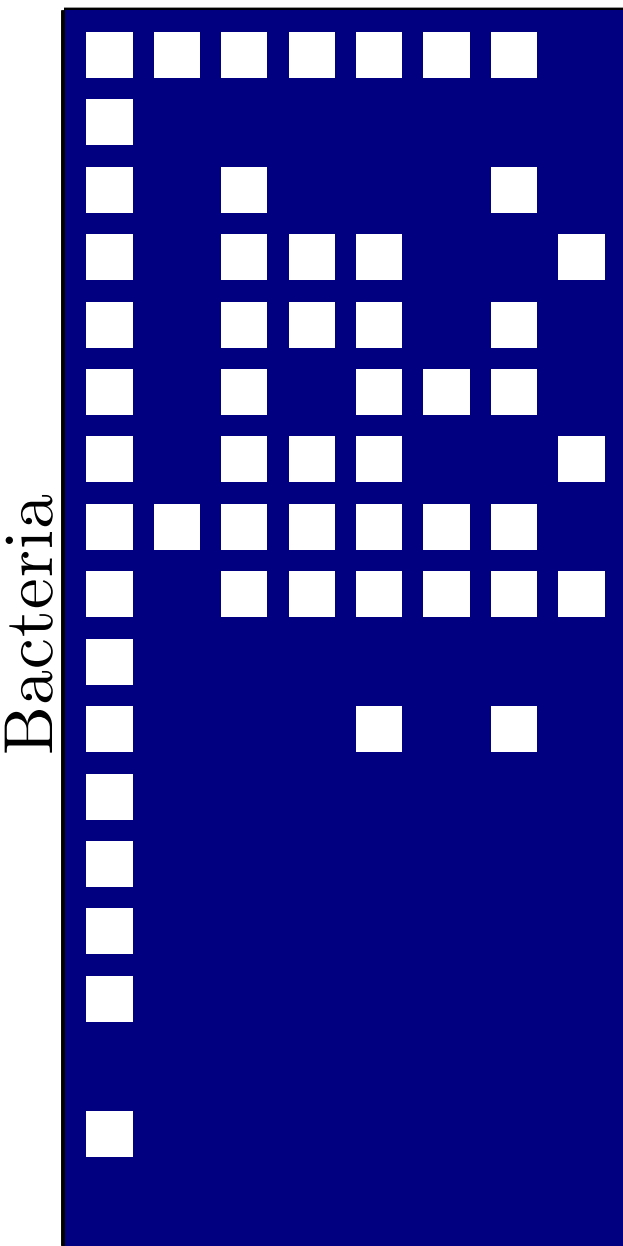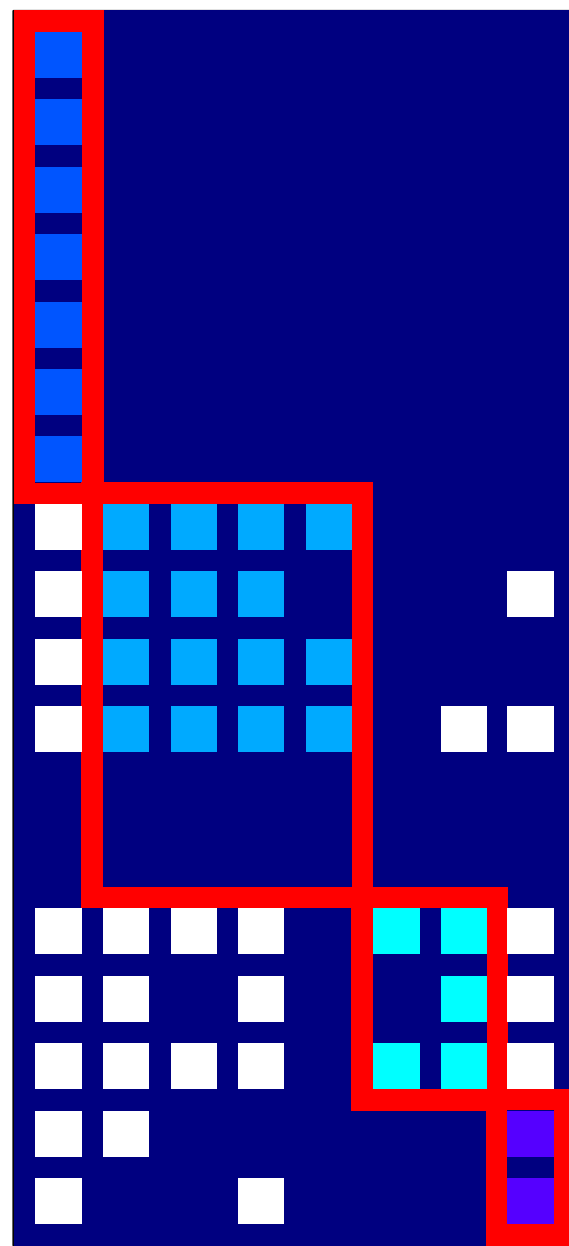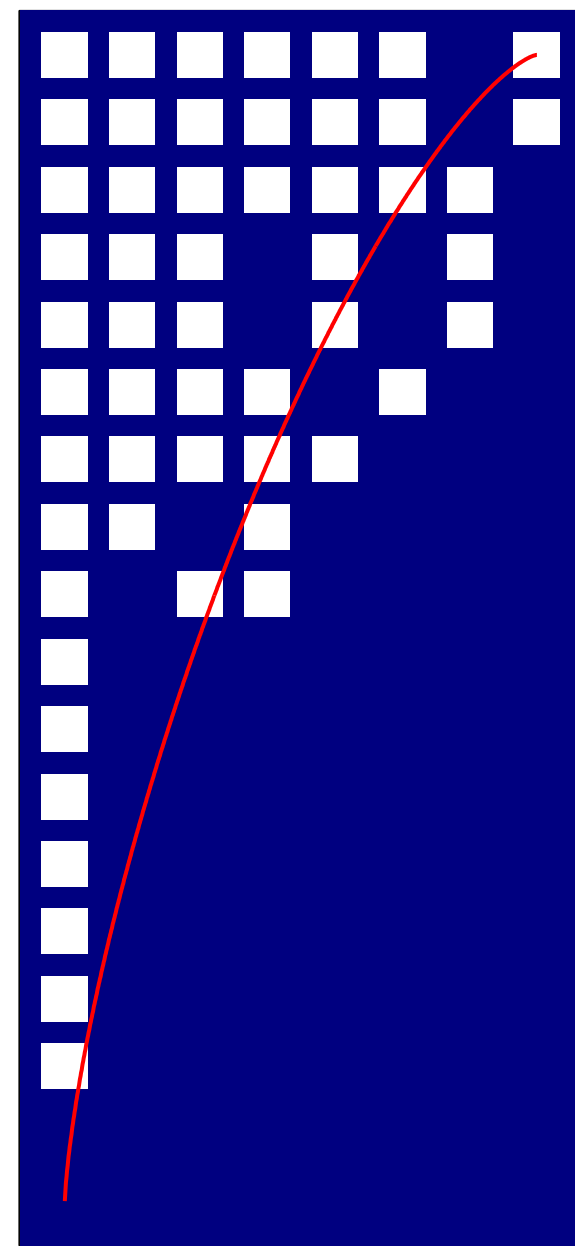

# 6 - Caso 1995

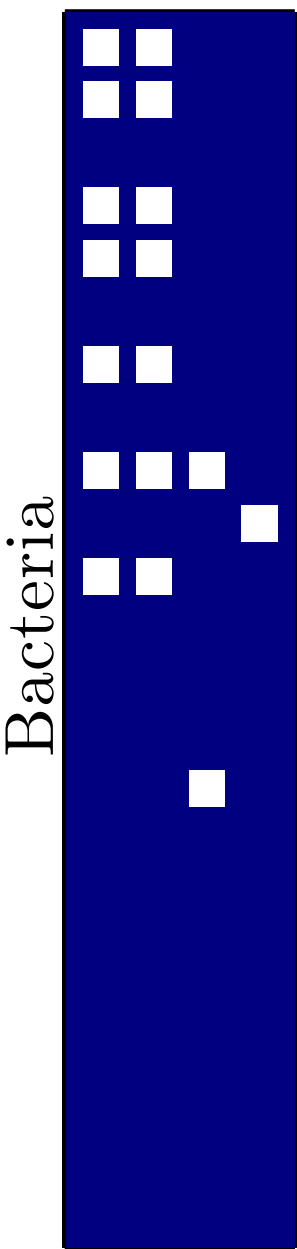

Phages

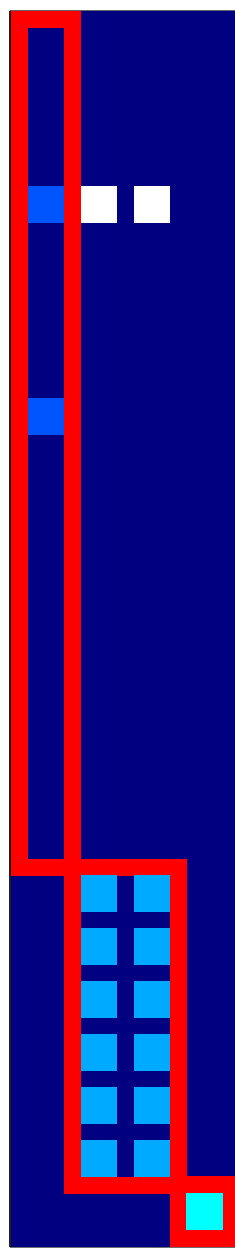

$Q = 0.27$

$z_Q = -3.65$

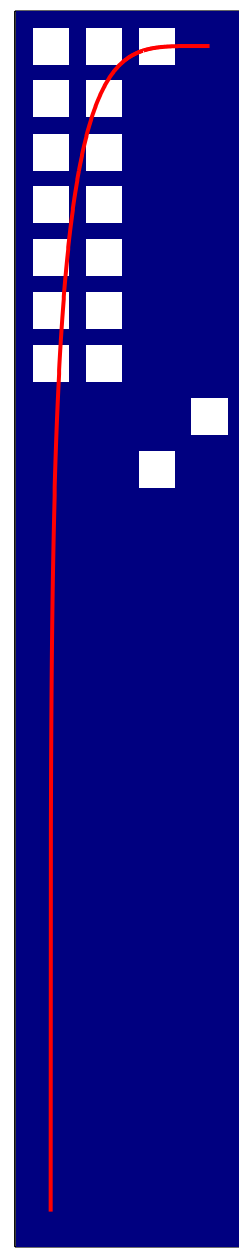

$N = 0.82$

$z_N = 0.32$

Bacteria

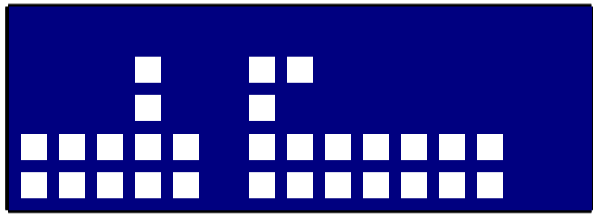

Phages

7 - Ceyssens 2009

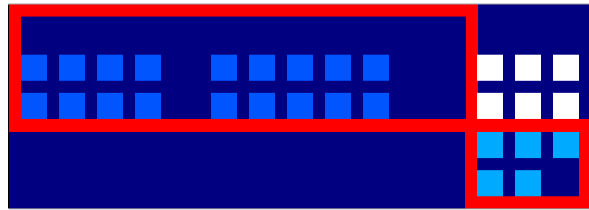

$$Q = 0.21$$

$$z_Q = -4.03$$

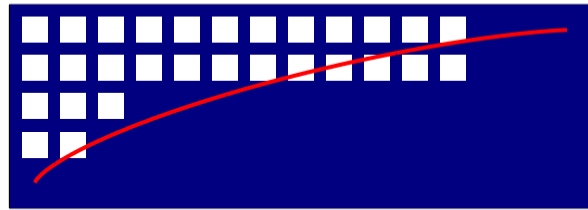

$$N = 0.98$$

$$z_N = 4.2$$

# 8 - Comeau 2005

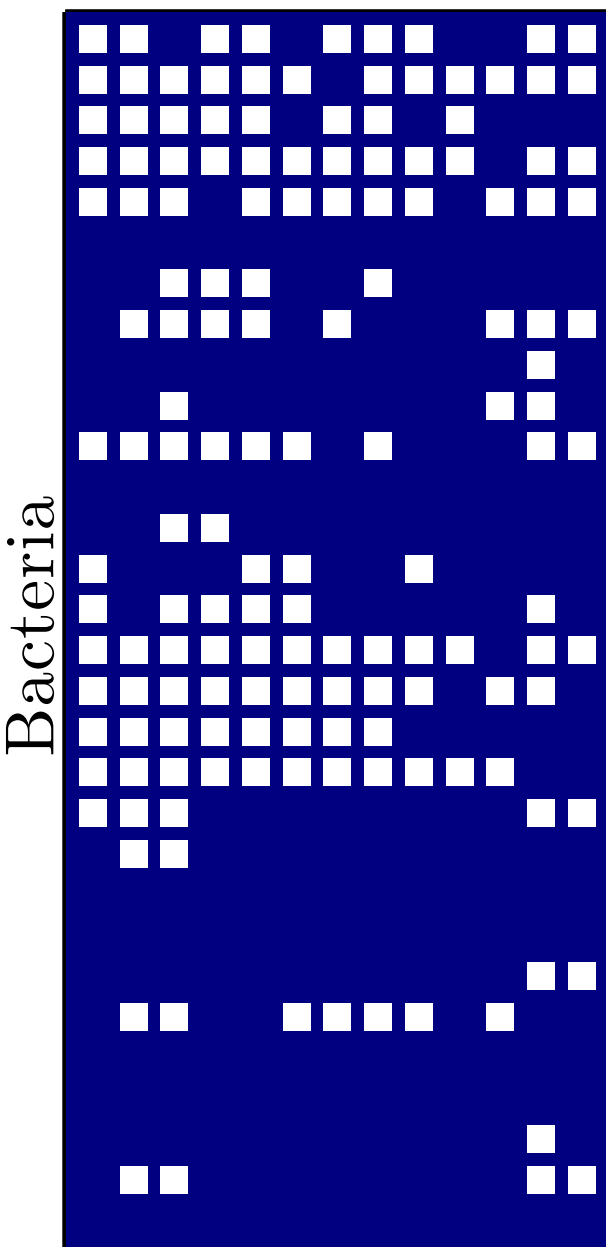

Phages

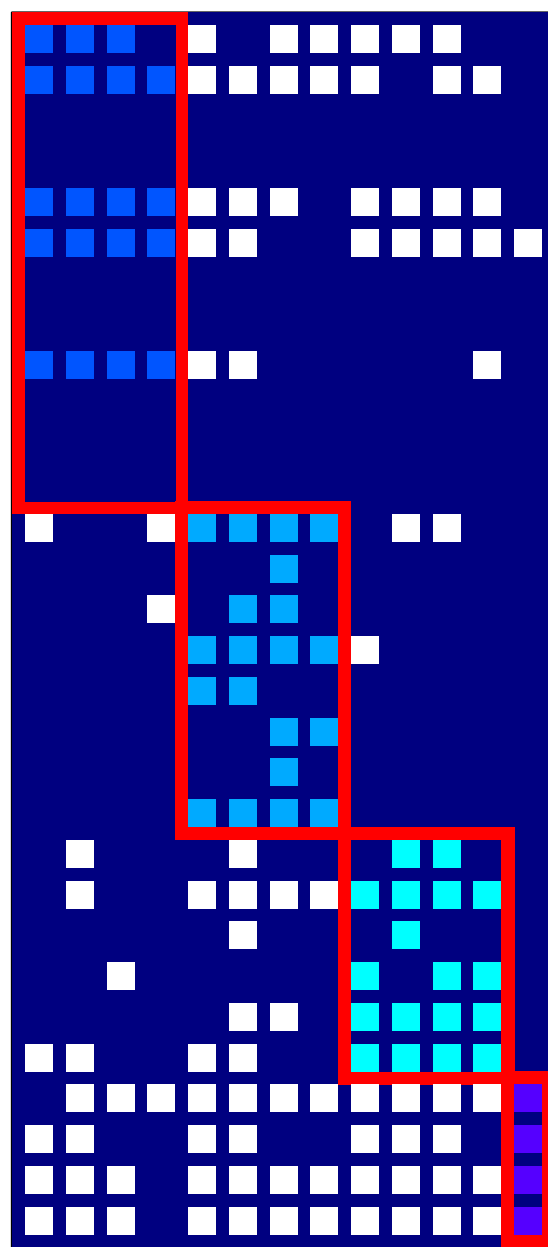

$Q = 0.17$

$z_Q = -7.81$

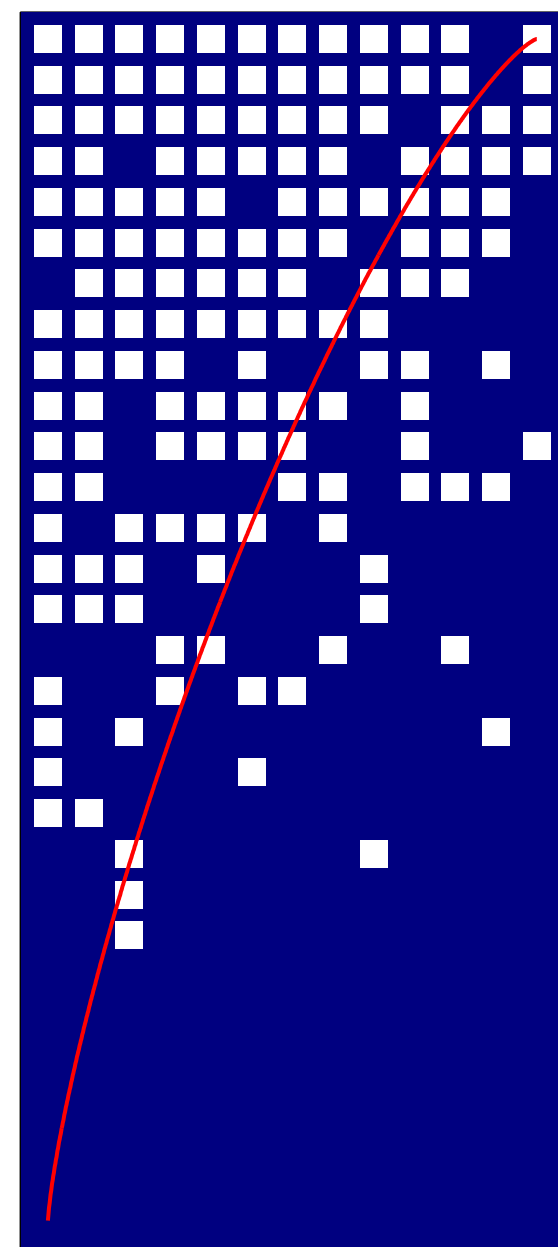

$N = 0.8$

$z_N = 8$



# 9 - Comeau 2006

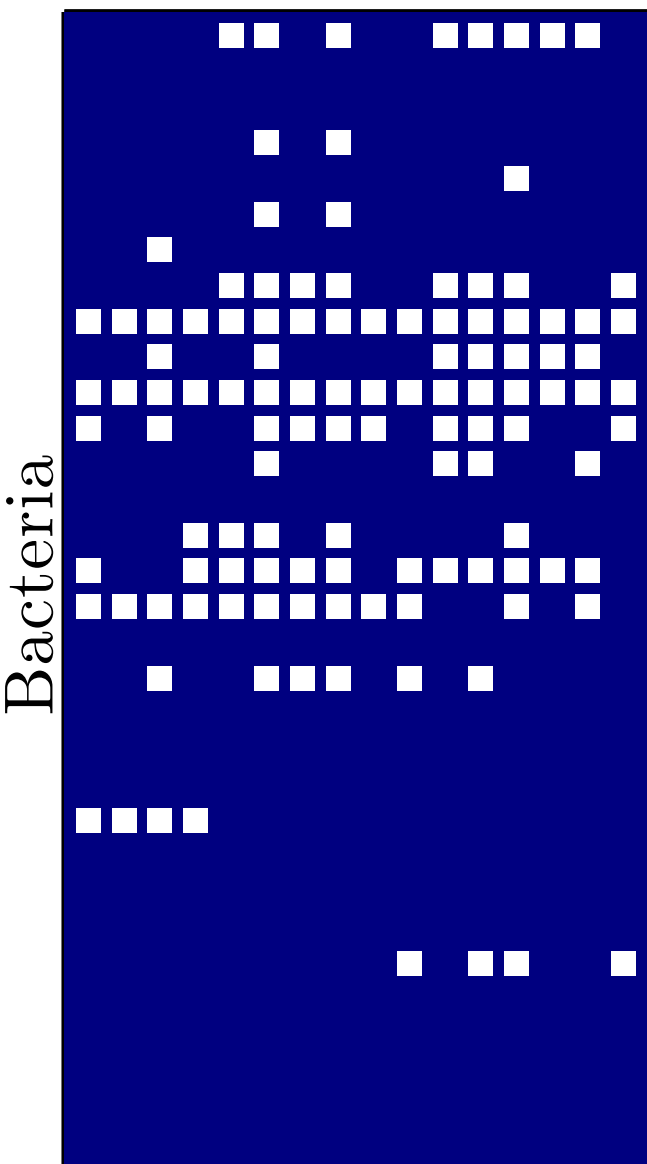

Phages

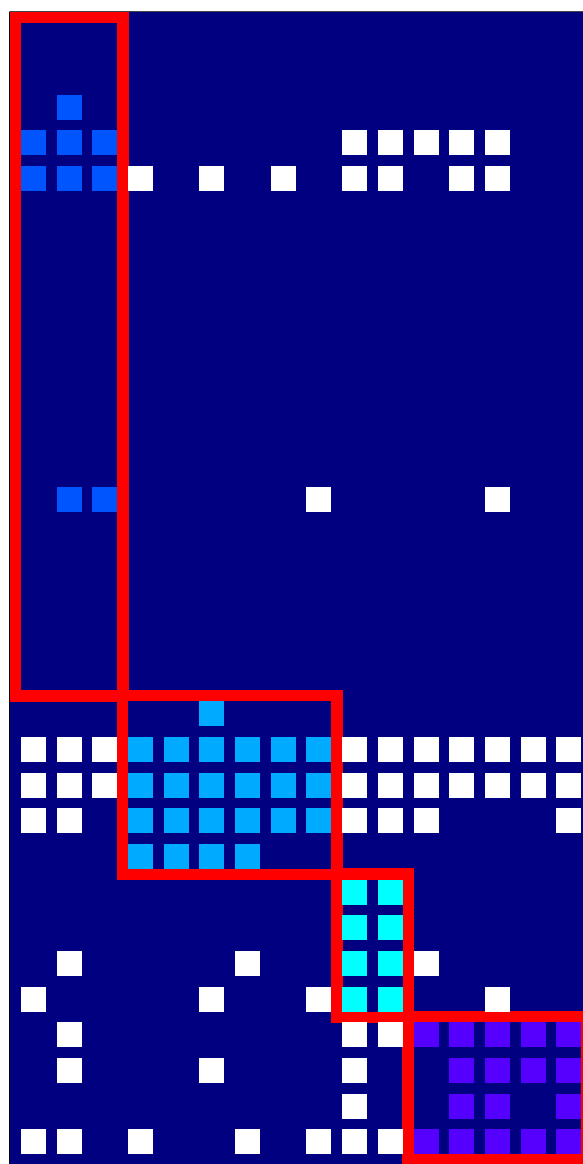

$Q = 0.22$

$z_Q = -10.05$

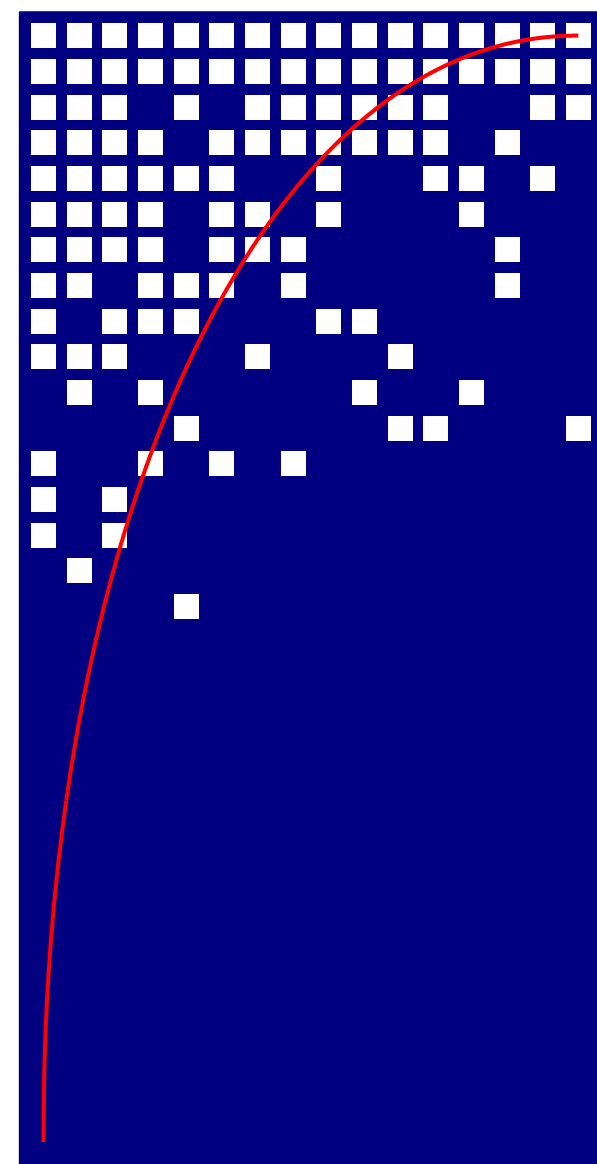

$N = 0.86$

$z_N = 6.52$

Bacteria

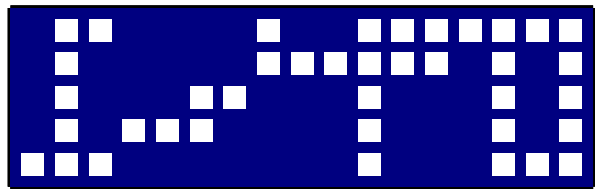

10 - DePaola 1998

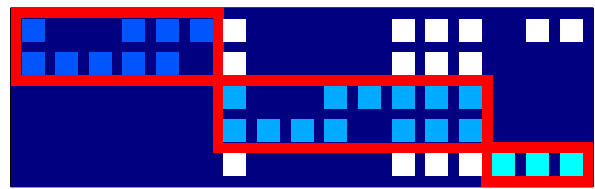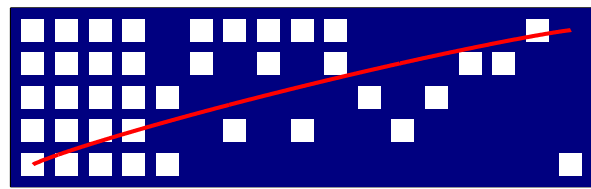

# 11 - Doi 2003

Bacteria

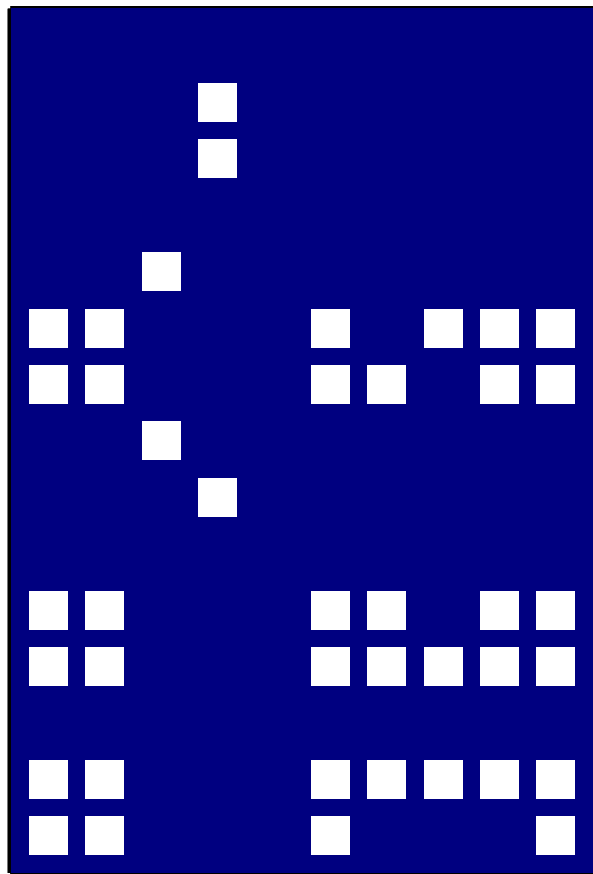

Phages

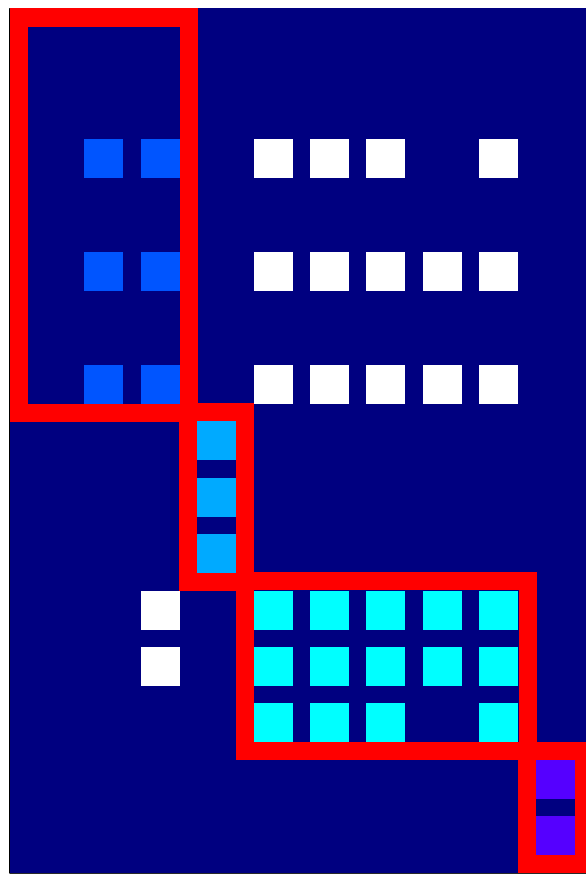

$$Q = 0.24$$

$$z_Q = -6.06$$

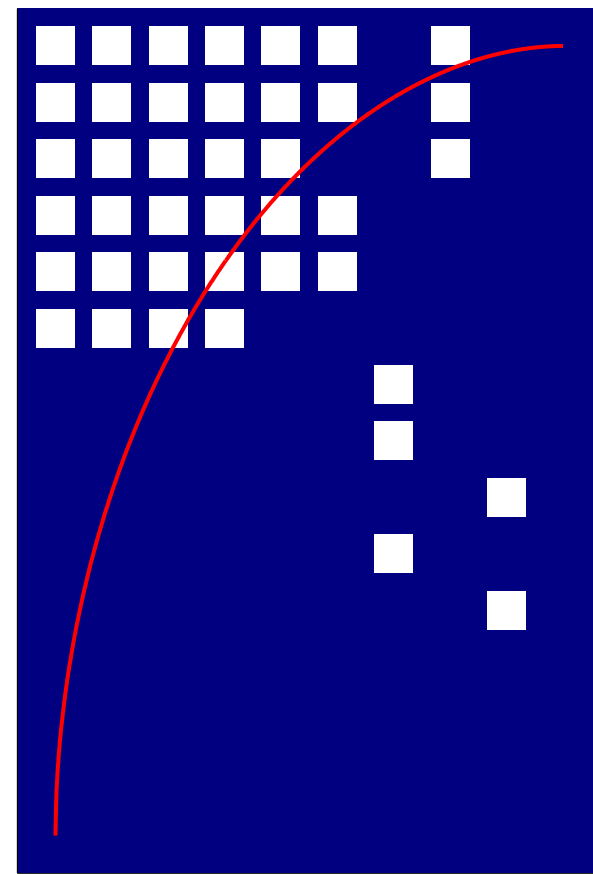

$$N = 0.83$$

$$z_N = 2.59$$

# 12 - Duplessis 2001

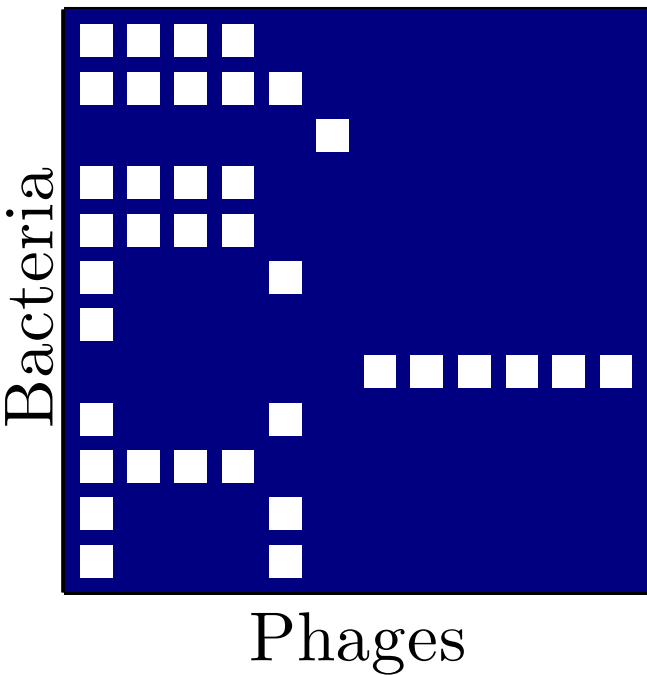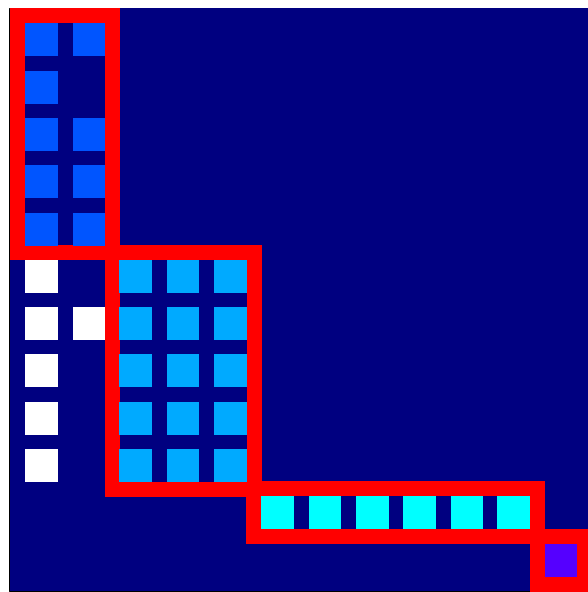

$$Q = 0.48$$
$$z_Q = 3.03$$

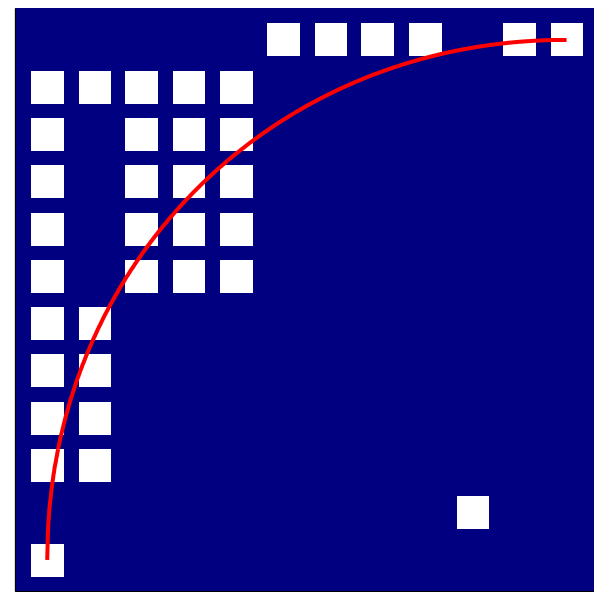

$$N = 0.88$$
$$z_N = 2.8$$

# 13 - Gamage 2004

Bacteria

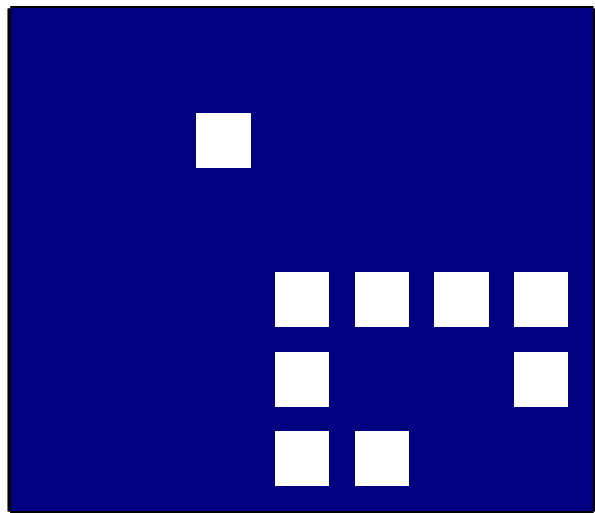

Phages

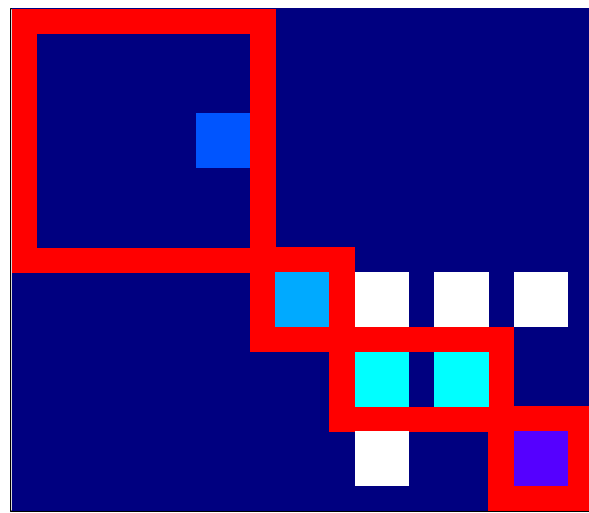

$Q = 0.32$

$z_Q = -1.88$

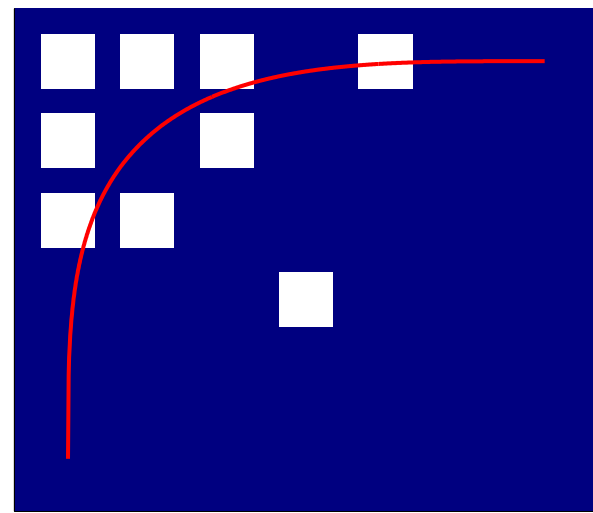

$N = 0.92$

$z_N = 0.45$

# 14 - Goodridge 2003

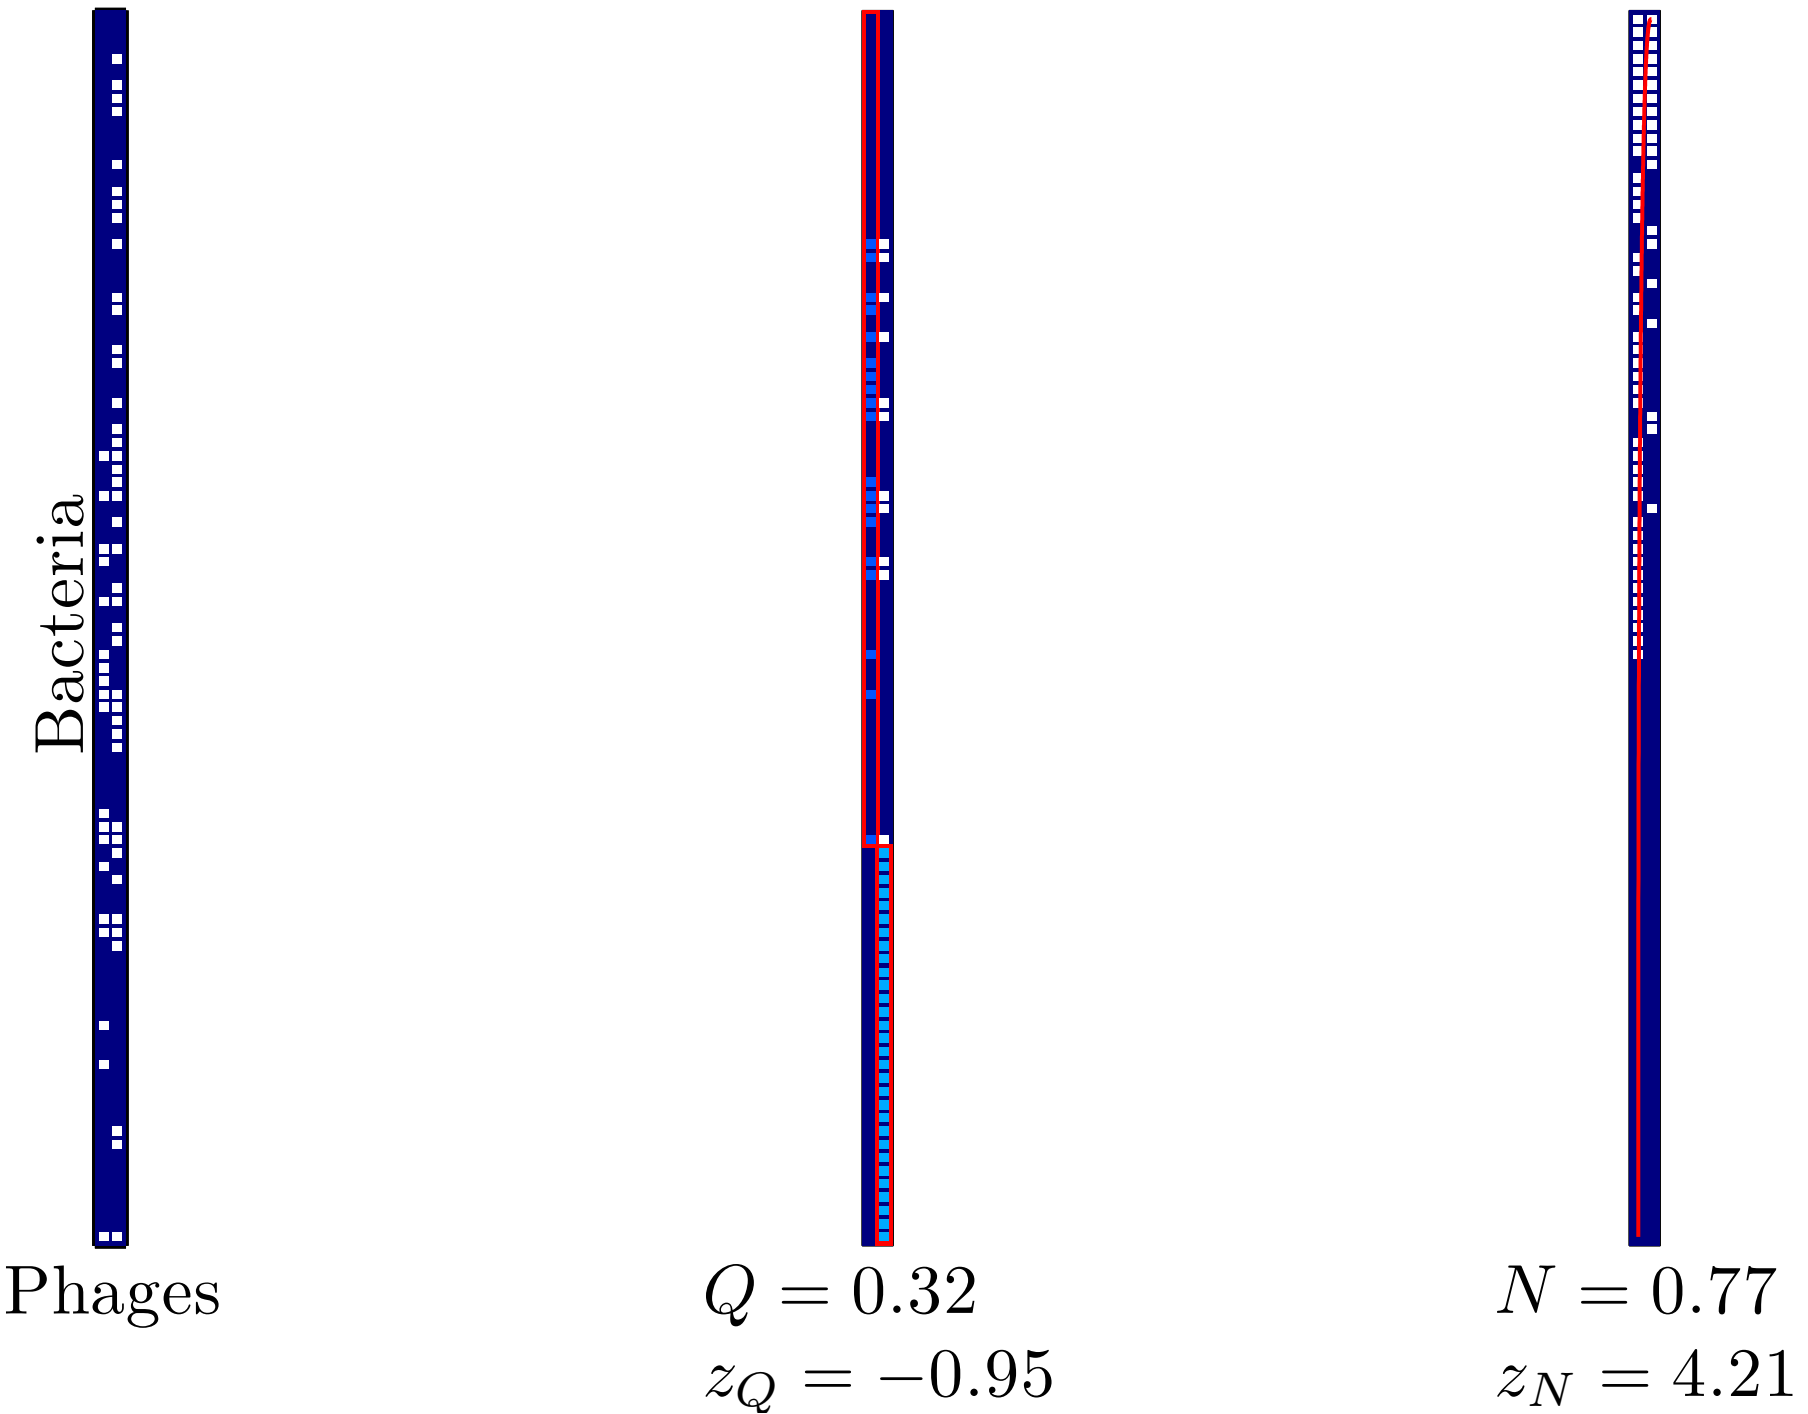

# 15 - Hansen 2007

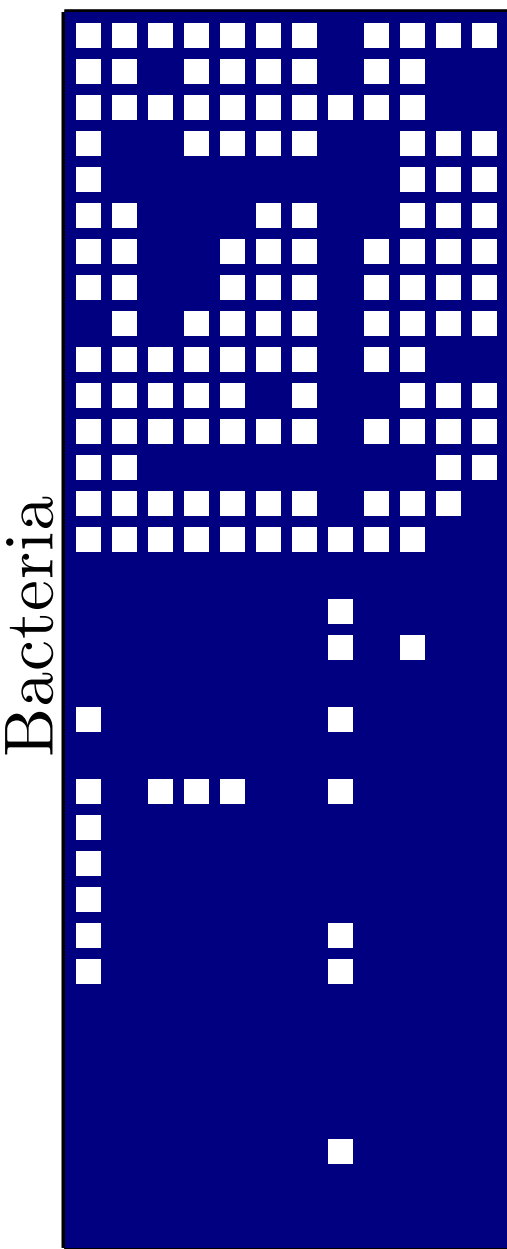

Phages

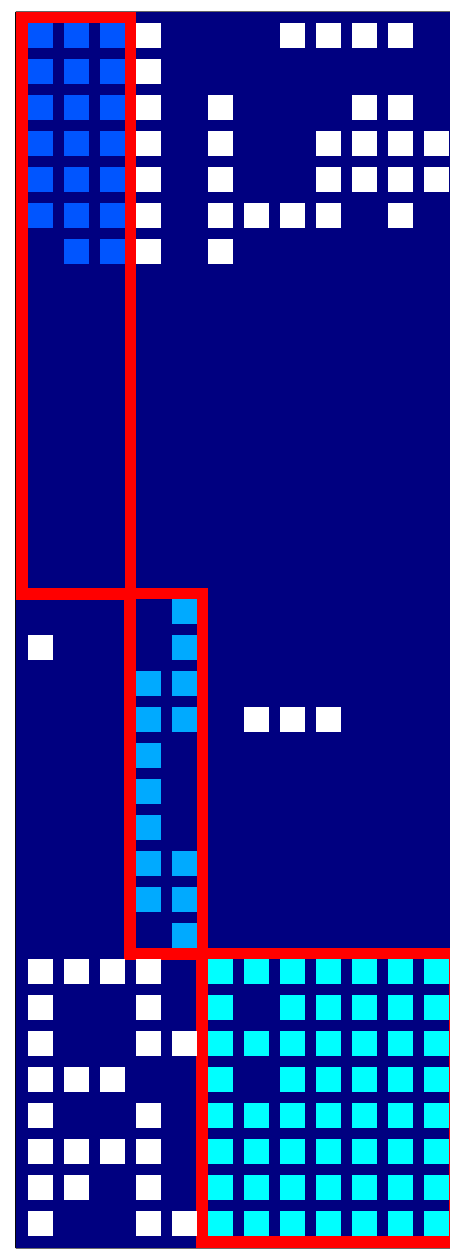

$Q = 0.2$

$z_Q = -6.37$

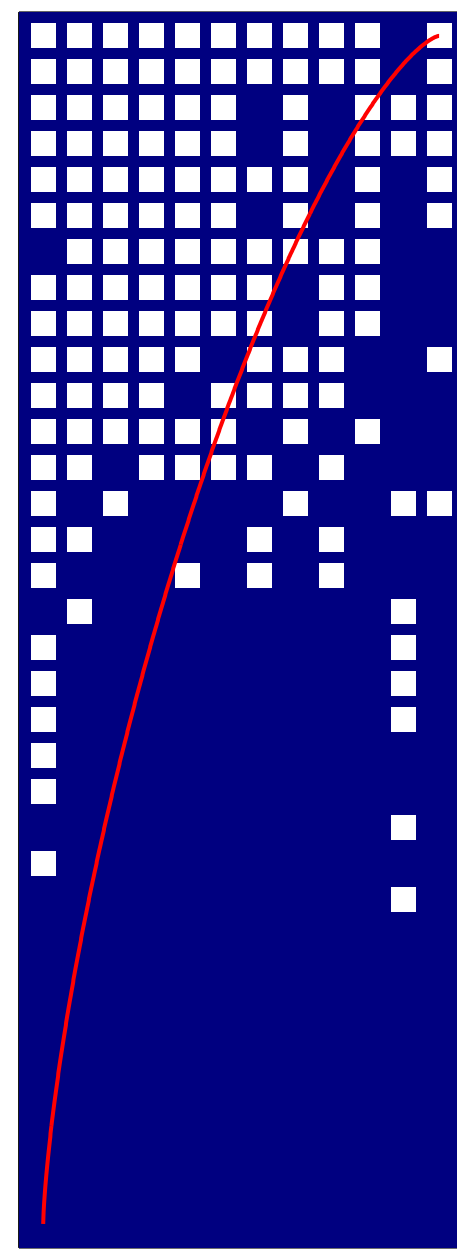

$N = 0.72$

$z_N = 6.01$

Bacteria

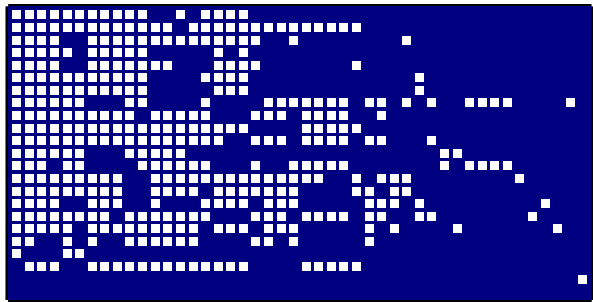

Phages

16 - Holmfeldt 2007

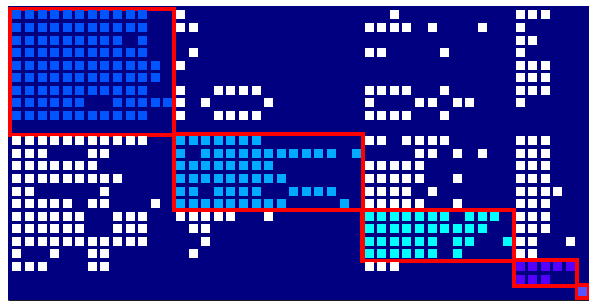

$$Q = 0.19$$

$$z_Q = -0.83$$

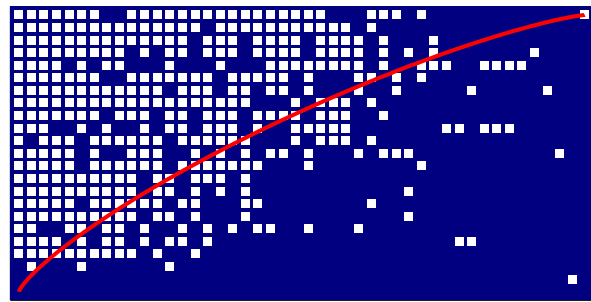

$$N = 0.83$$

$$z_N = 16.92$$



# 17 - Kankila 1994

Bacteria

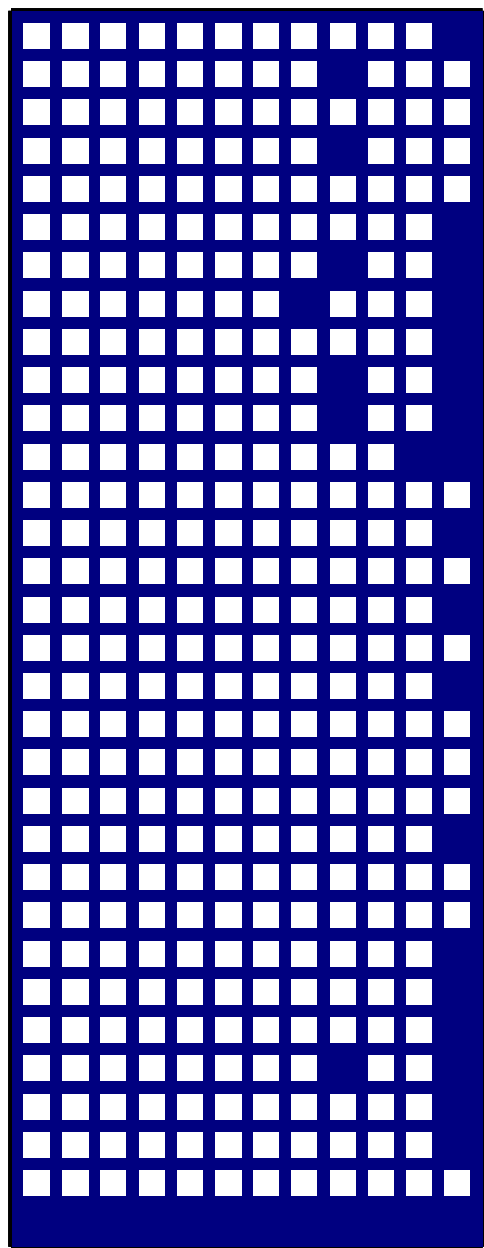

Phages

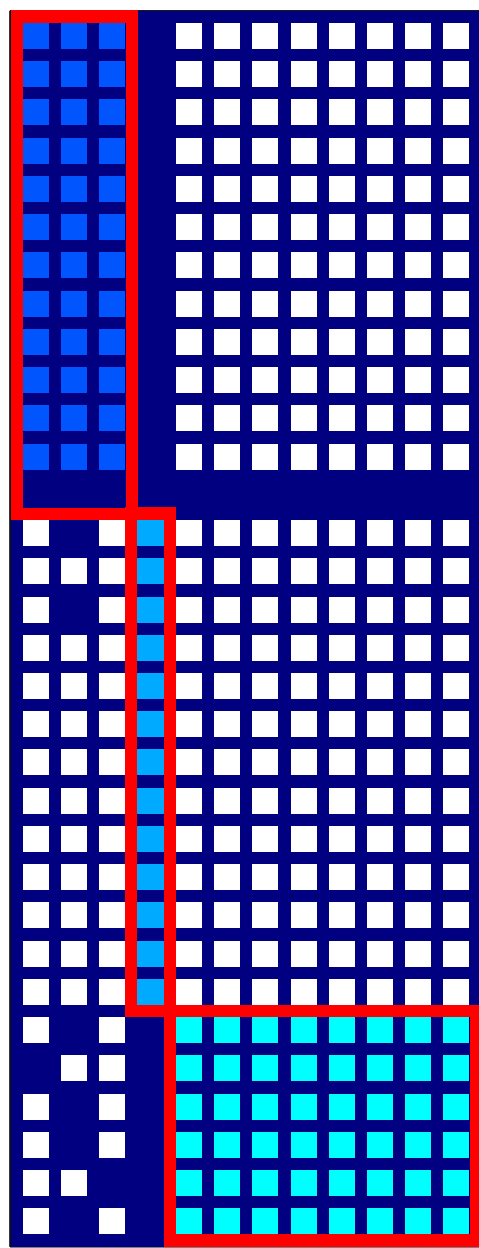

$Q = 0.05$

$z_Q = -1.95$

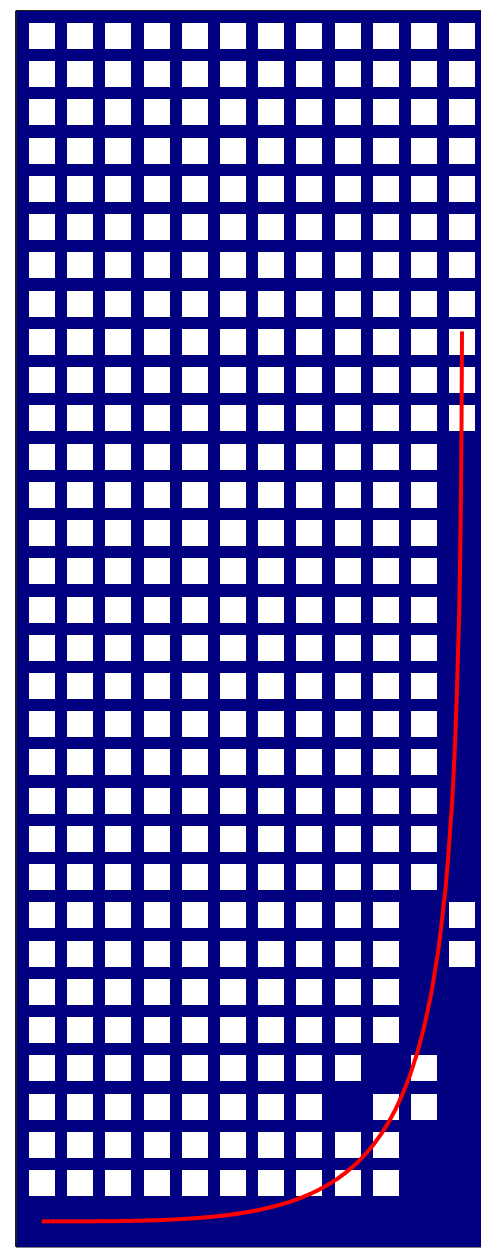

$N = 1$

$z_N = 3.96$

# 18 - Krylov 2006

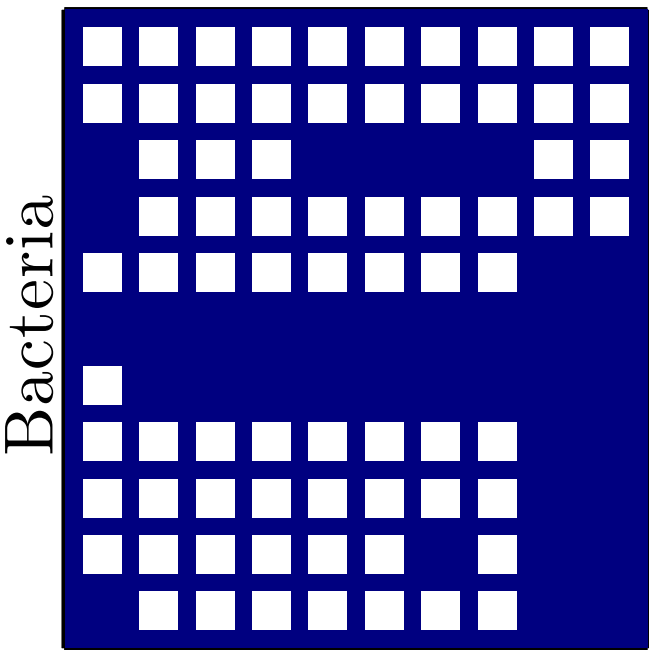

Phages

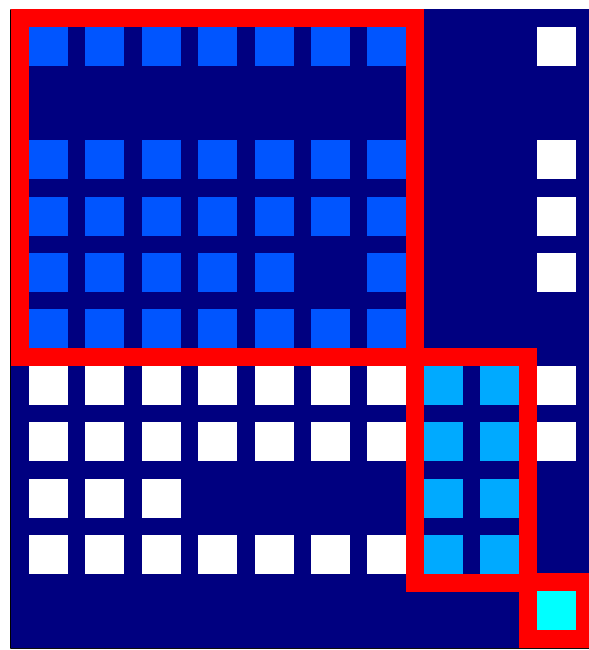

$$Q = 0.12$$

$$z_Q = -4.38$$

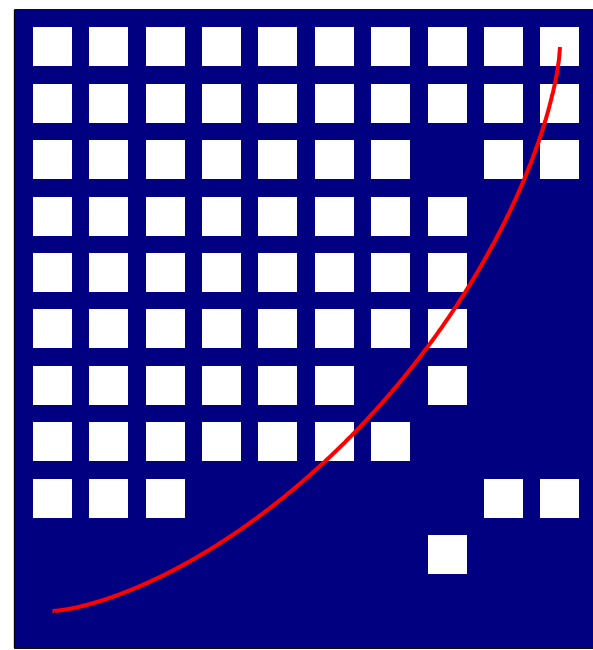

$$N = 0.9$$

$$z_N = 3.48$$

# 19 - Kudva 1999

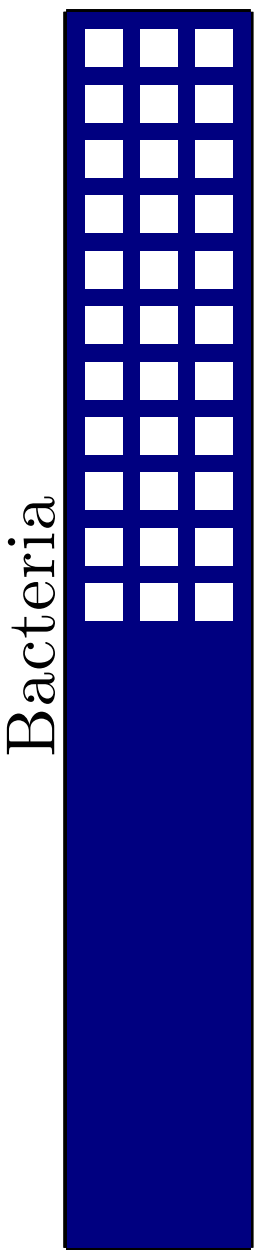

Phages

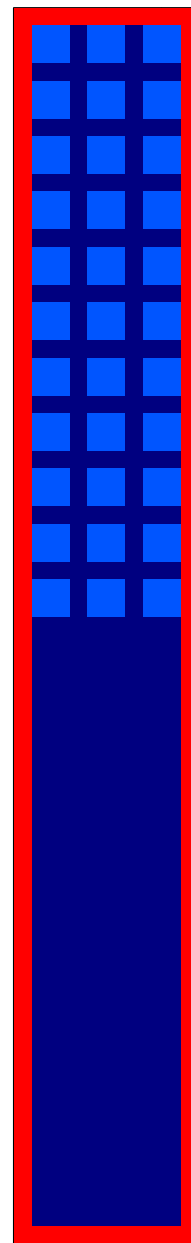

$$Q = 0$$

$$z_Q = -8.17$$

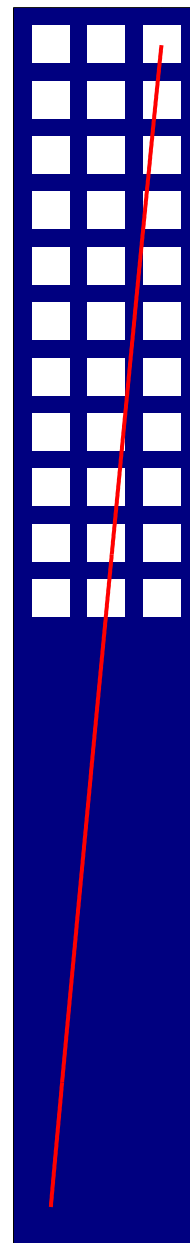

$$N = 0.63$$

$$z_N = 0.02$$

# 20 - Langley 2003

Bacteria

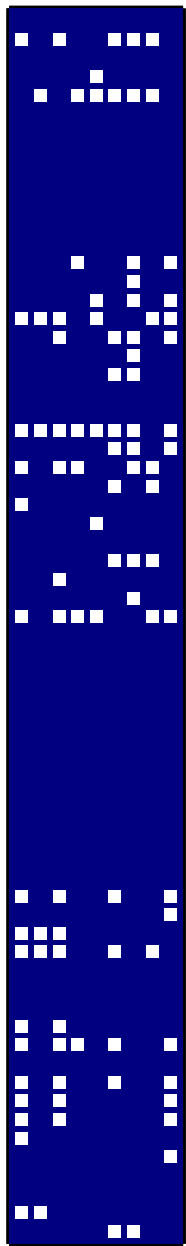

Phages

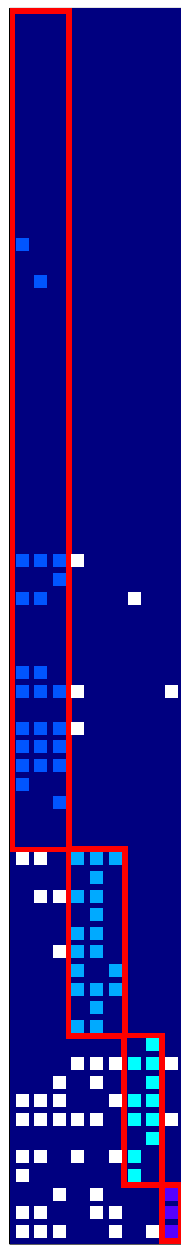

$$Q = 0.31$$

$$z_Q = -7.24$$

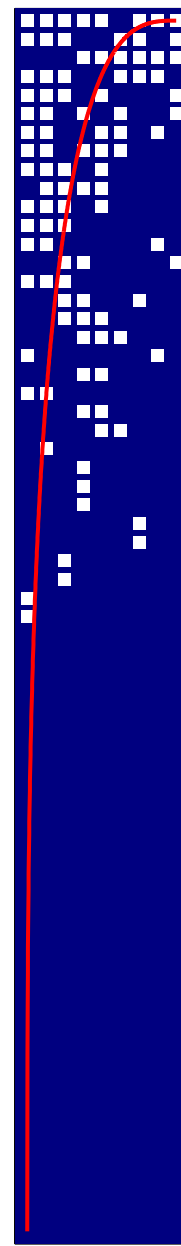

$$N = 0.86$$

$$z_N = 4.89$$

# 21 - McLaughlin 2008

Bacteria

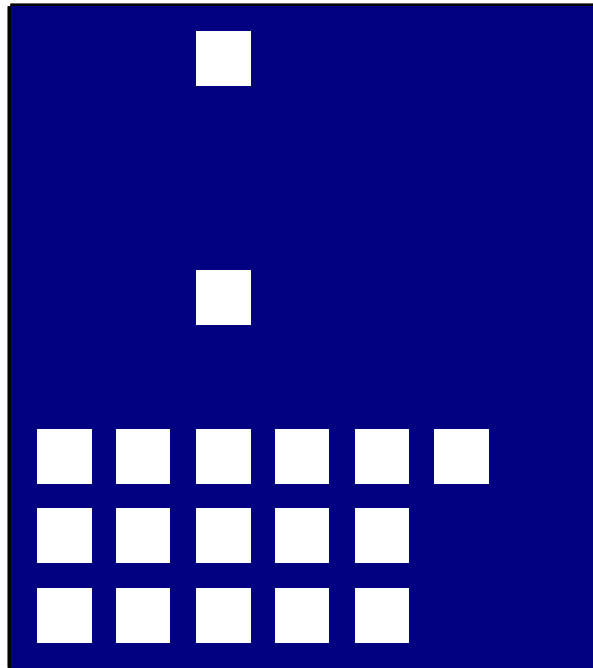

Phages

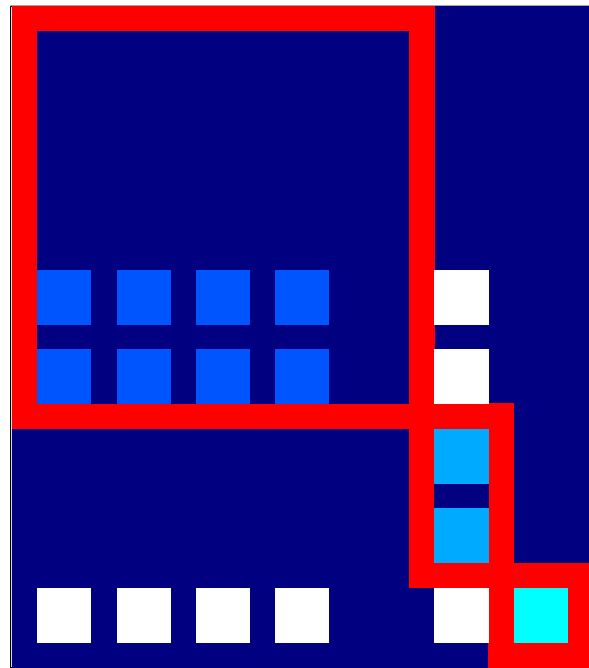

$Q = 0.19$

$z_Q = -4.68$

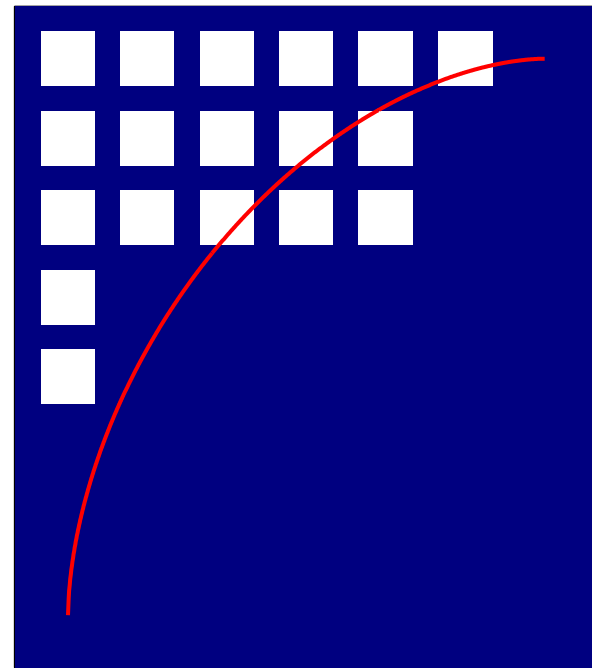

$N = 0.98$

$z_N = 2.44$

# 22 - Meyer unpub

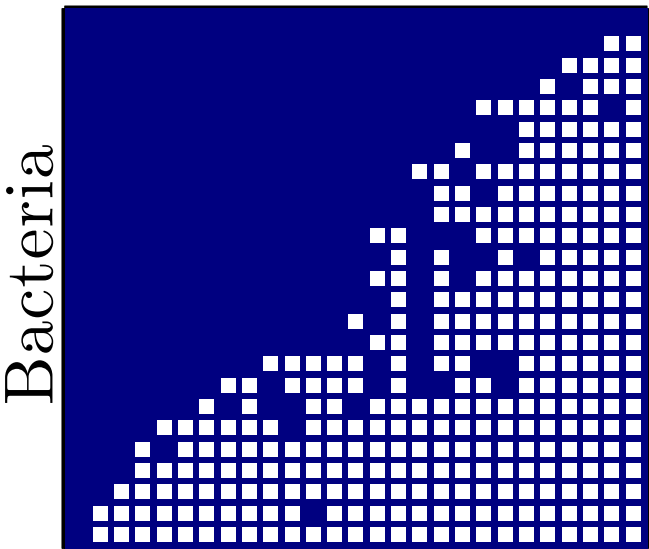

Phages

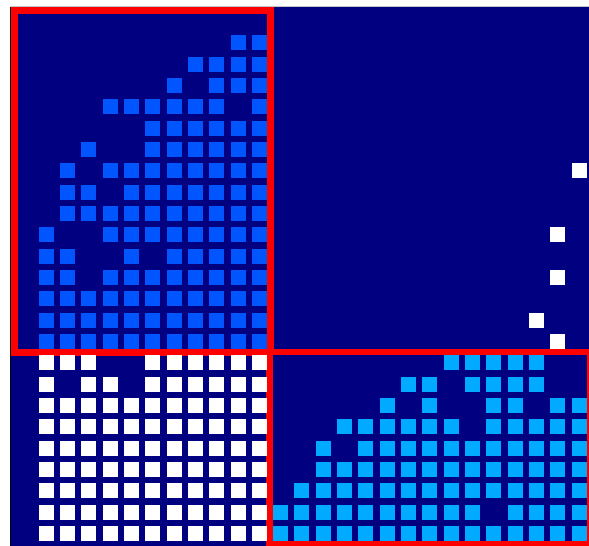

$$Q = 0.22$$

$$z_Q = 7.54$$

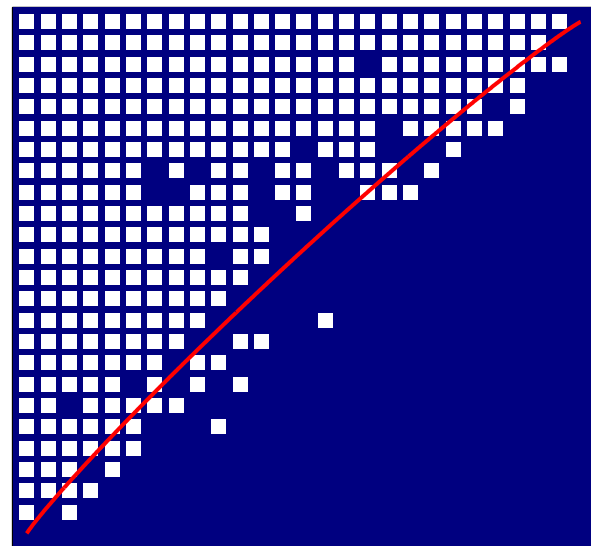

$$N = 0.98$$

$$z_N = 18.31$$

# 23 - Middelboe 2009

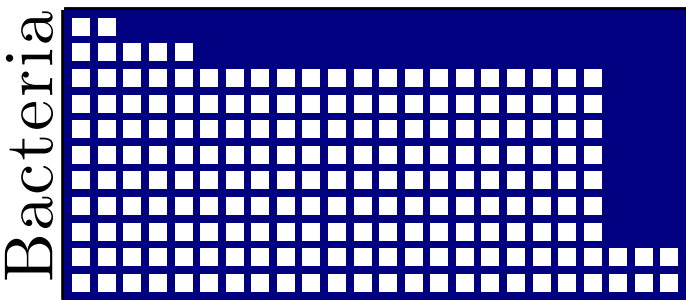

Phages

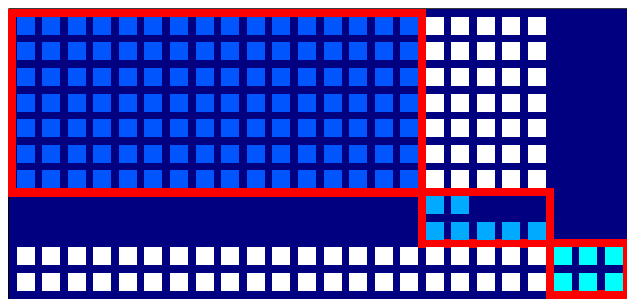

$Q = 0.08$

$z_Q = -5.22$

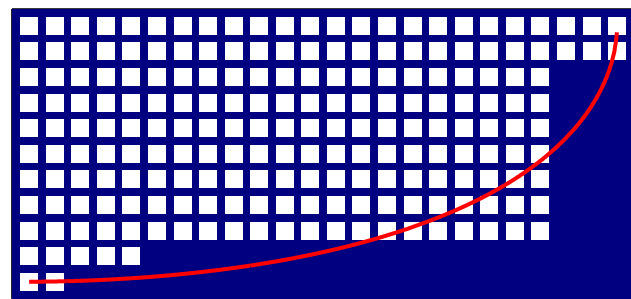

$N = 0.99$

$z_N = 5.99$

# 24 - Miklic 2003

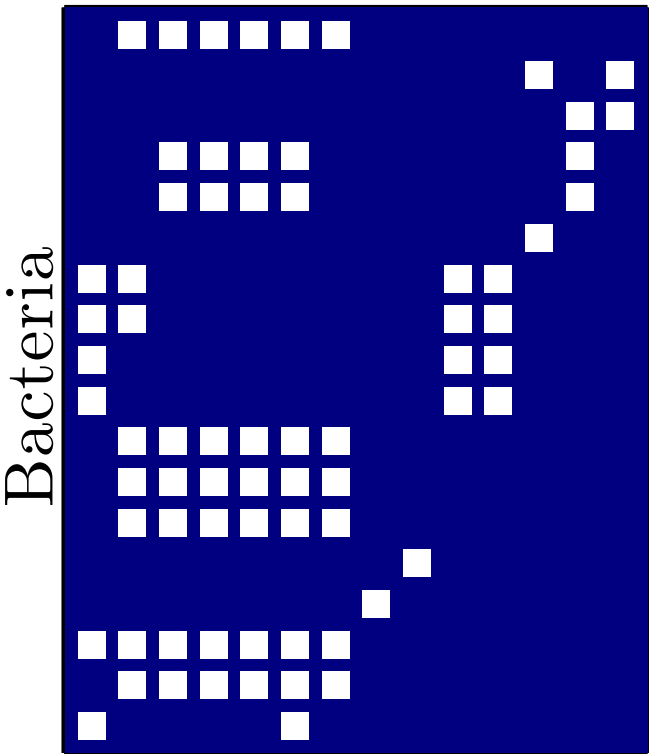

Phages

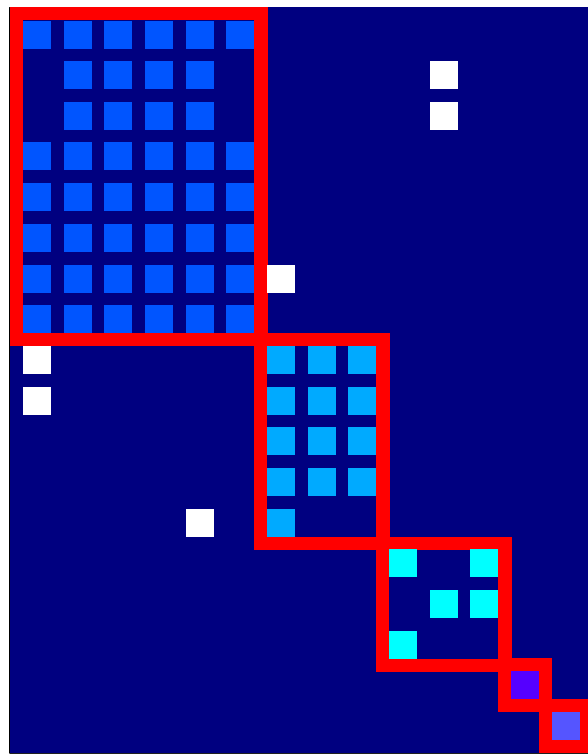

$Q = 0.41$   
 $z_Q = 3.88$

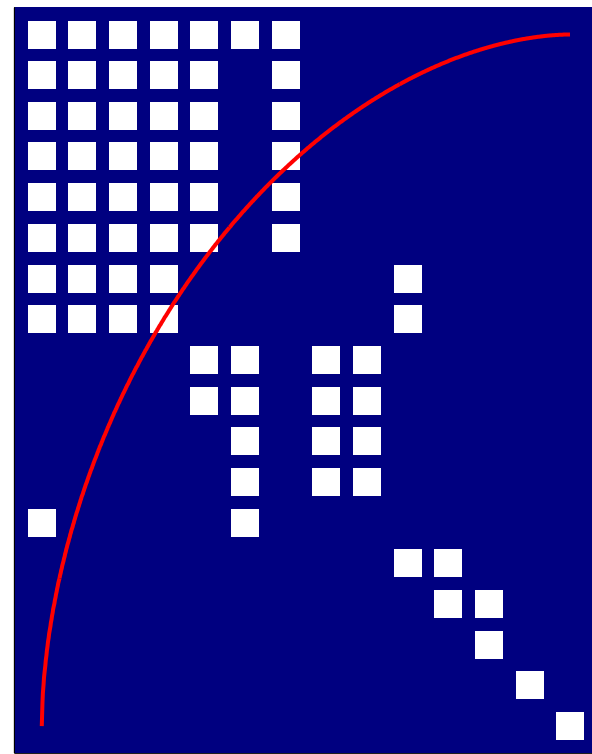

$N = 0.71$   
 $z_N = 2.35$



# 25 - Mizoguchi 2003

Bacteria

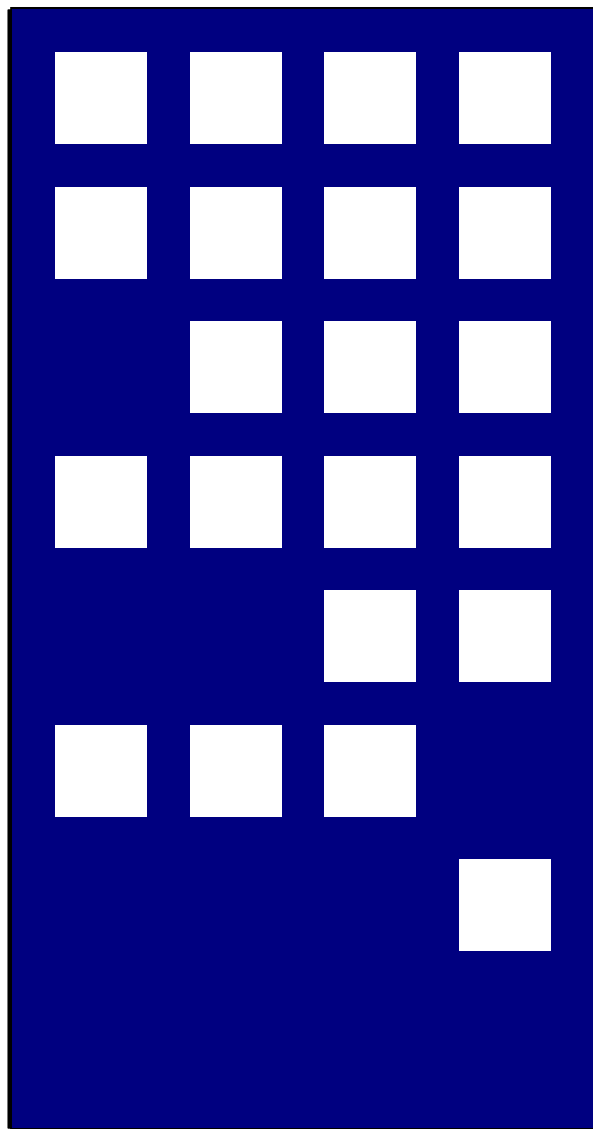

Phages

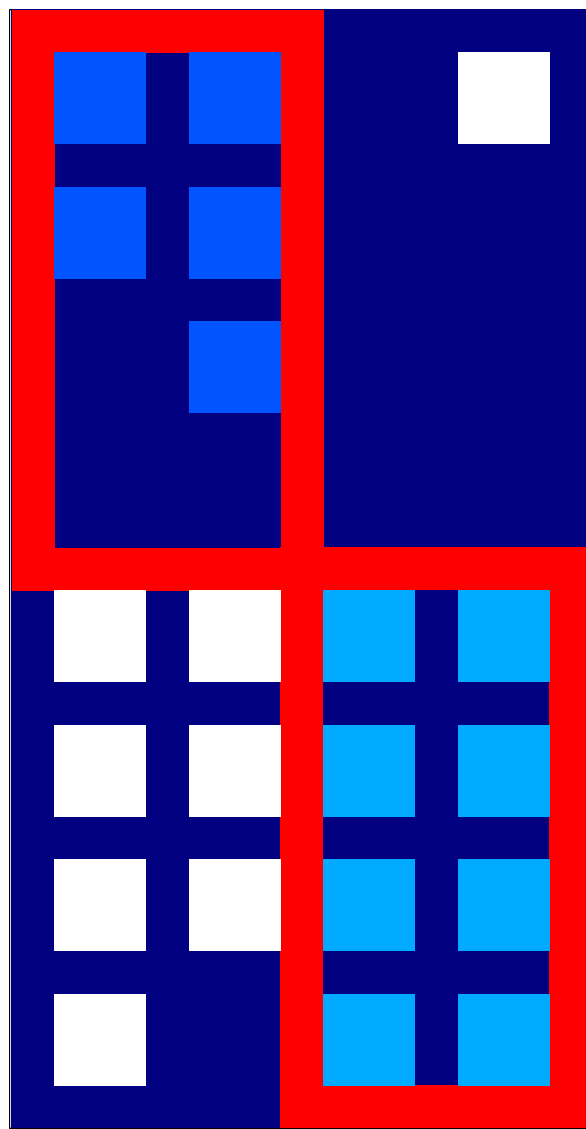

$$Q = 0.15$$

$$z_Q = -2.25$$

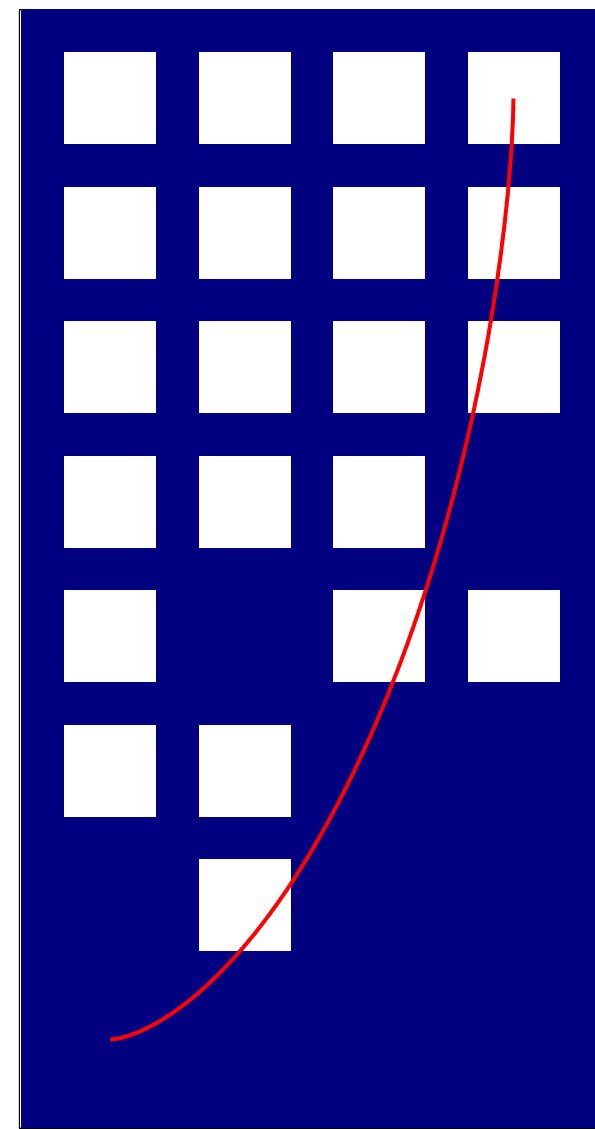

$$N = 0.85$$

$$z_N = 0.65$$

# 26 - Pantucek 1998

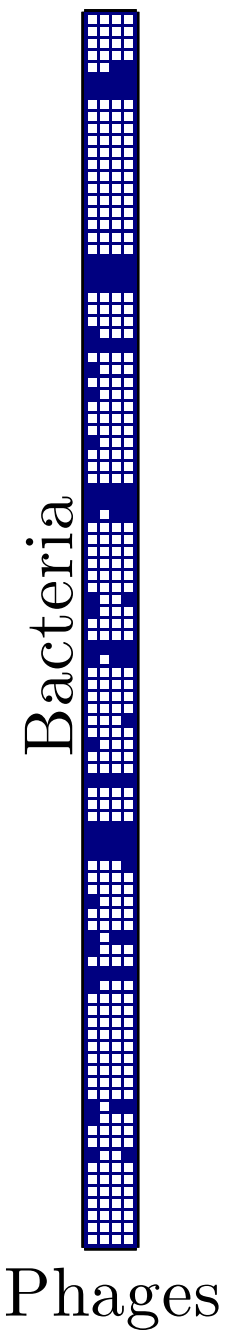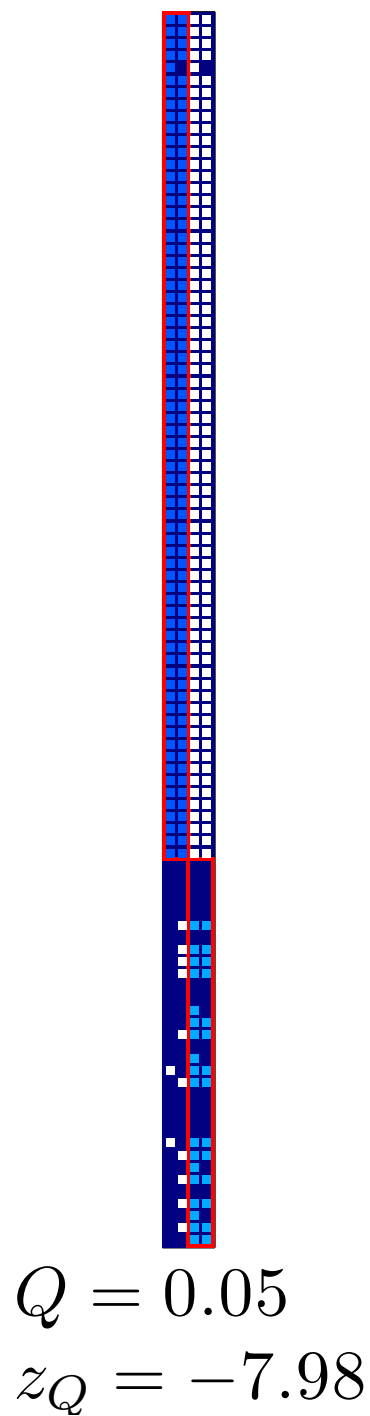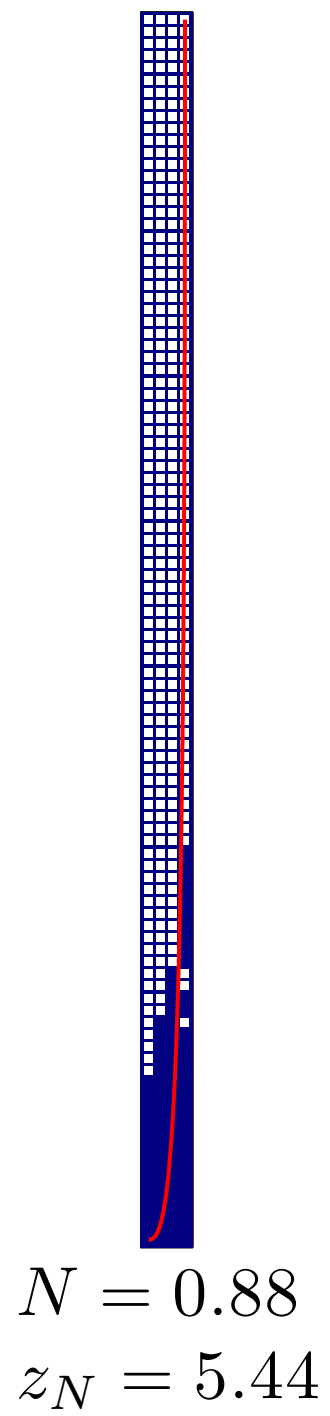

# 27 - Paterson 2010

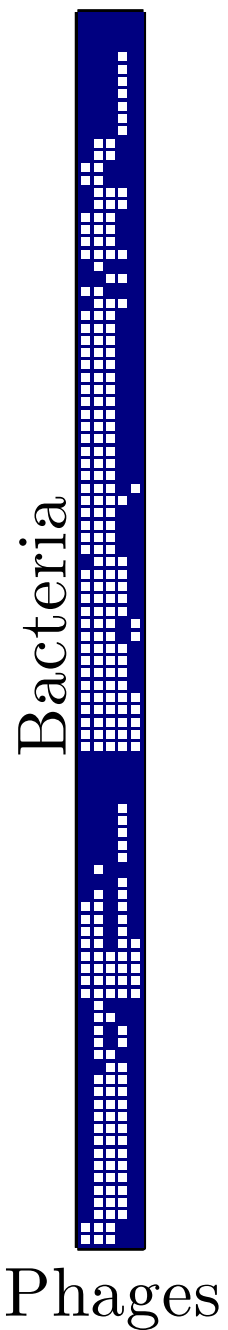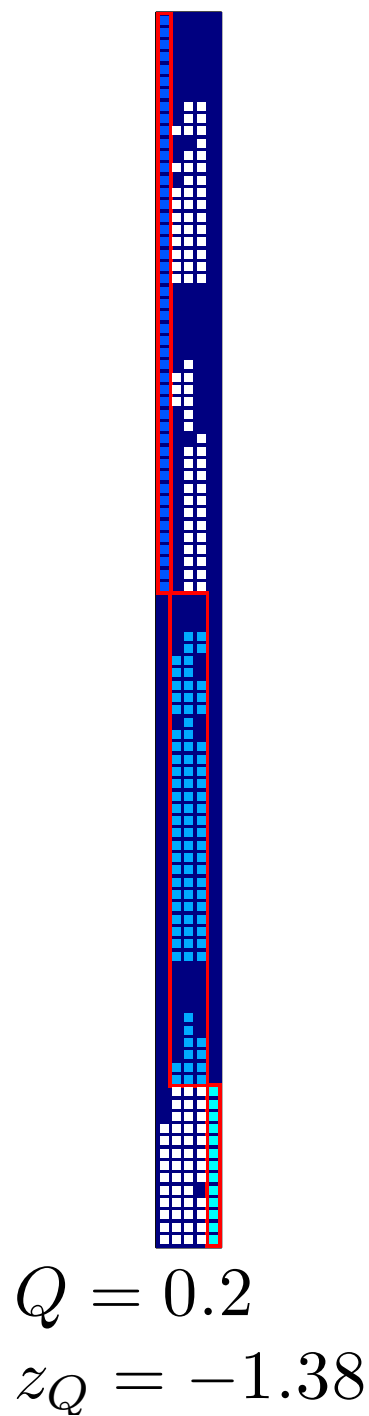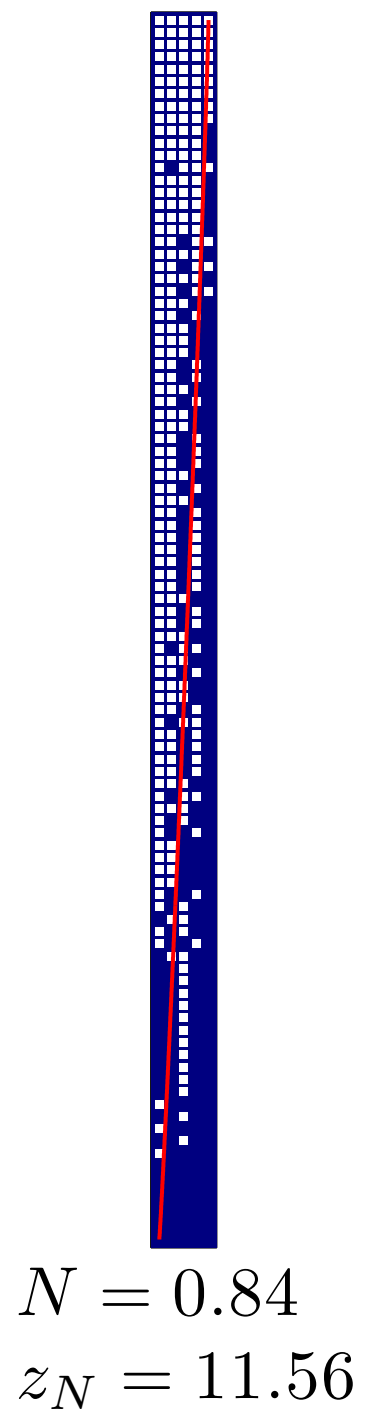

# 28 - Poullain 2008

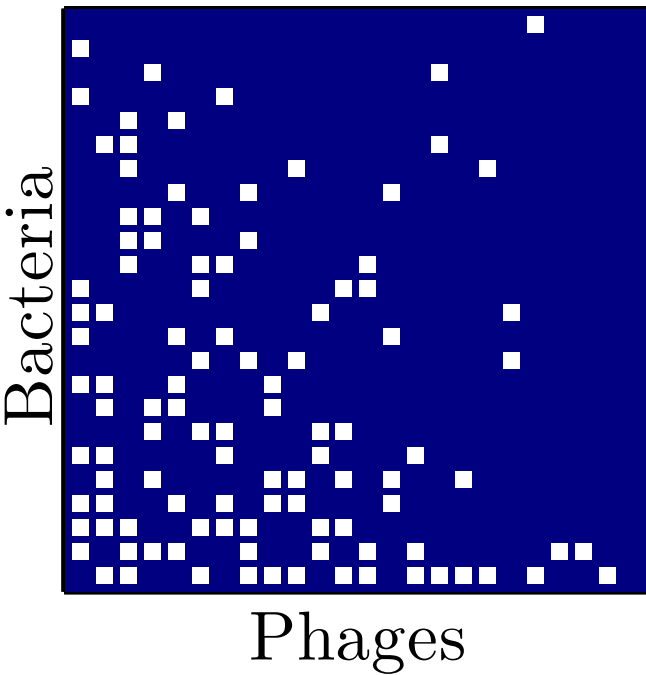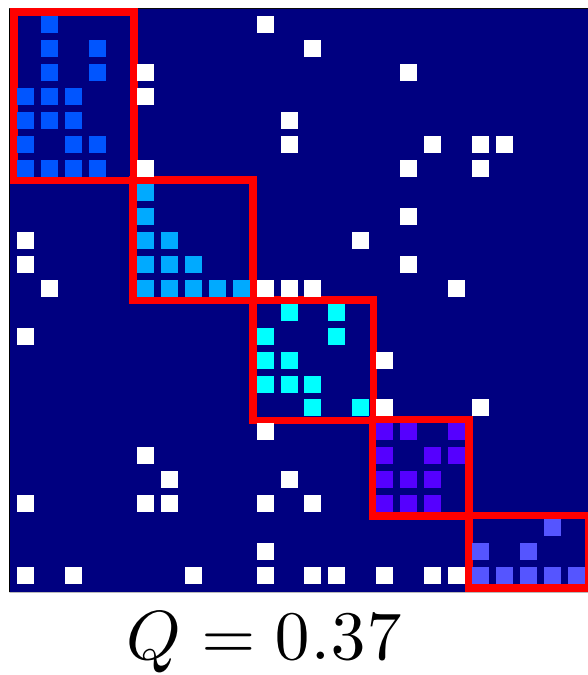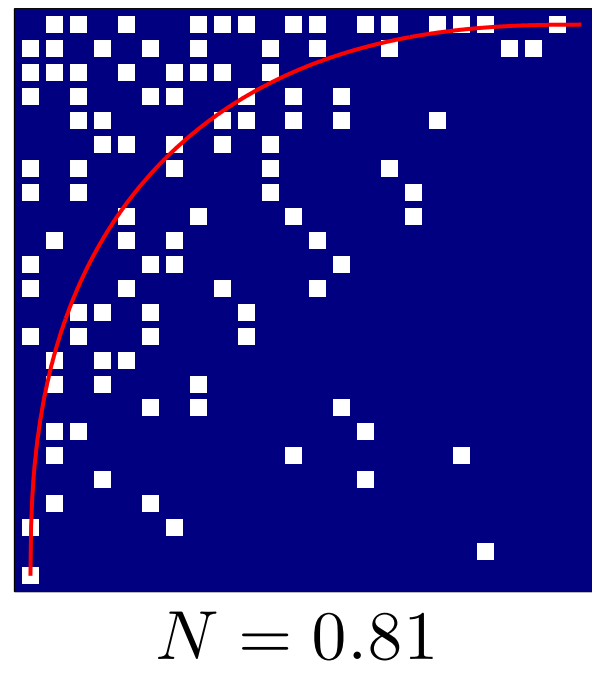

# 29 - Quiberoni 2003

Bacteria

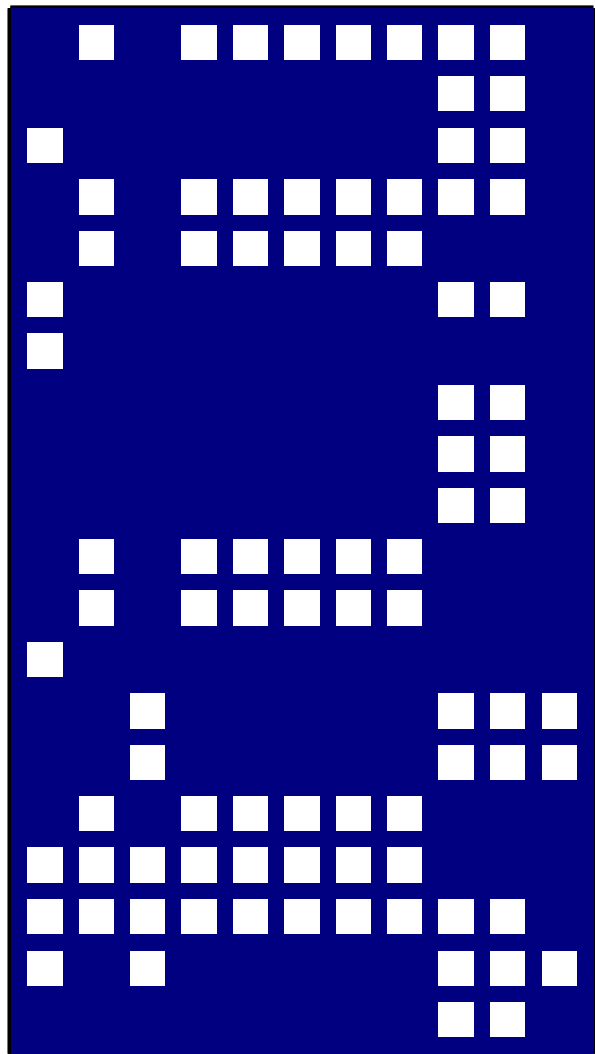

Phages

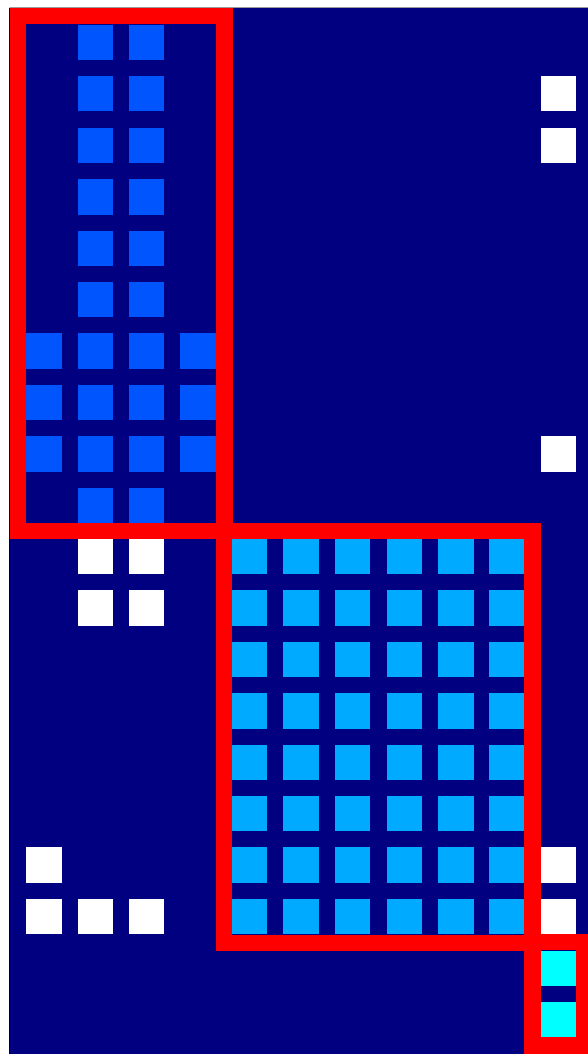

$Q = 0.38$   
 $z_Q = 9.62$

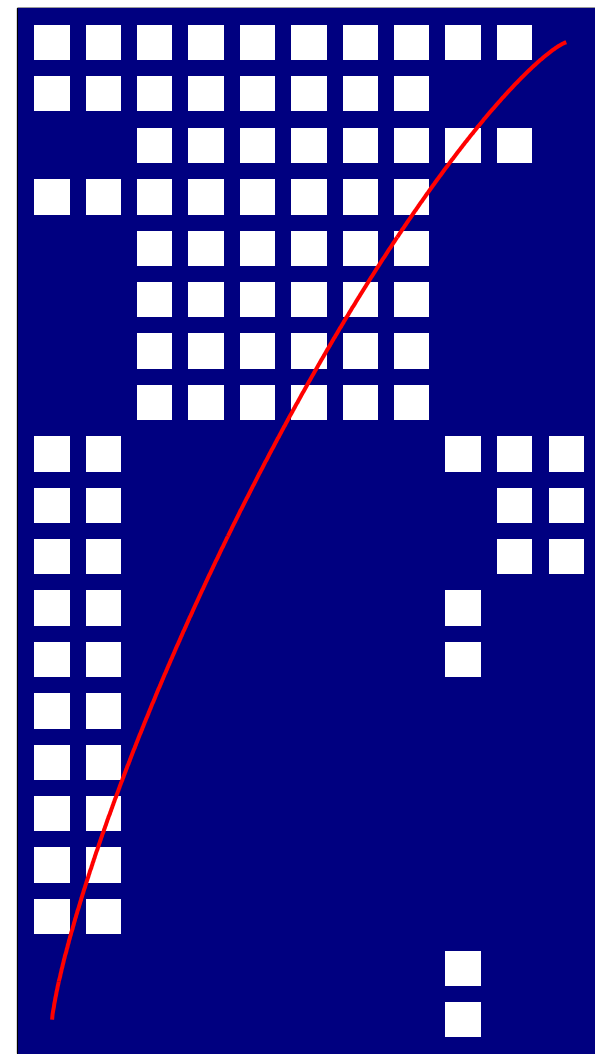

$N = 0.64$   
 $z_N = 2.77$

# 30 - Rybniiker 2006

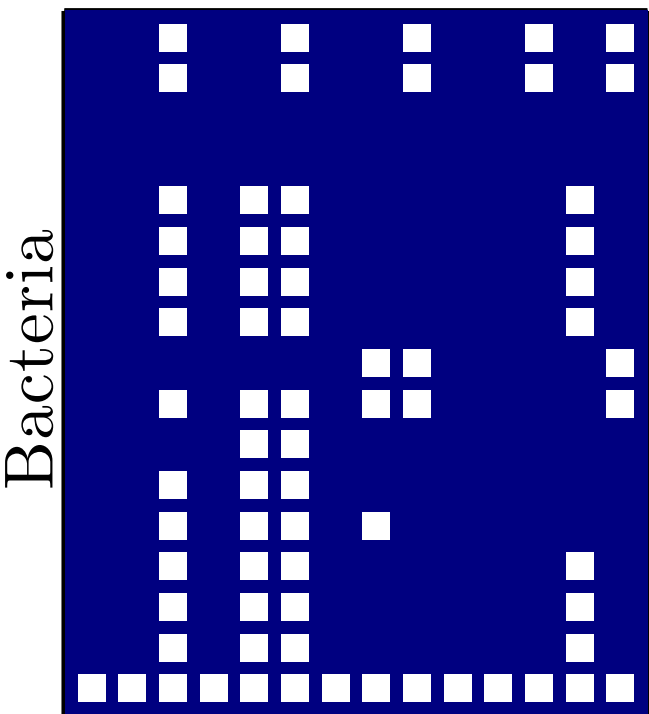

Phages

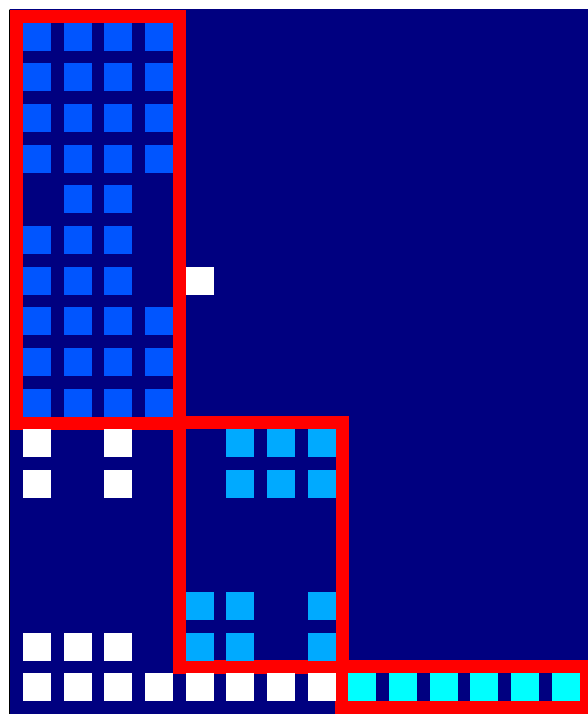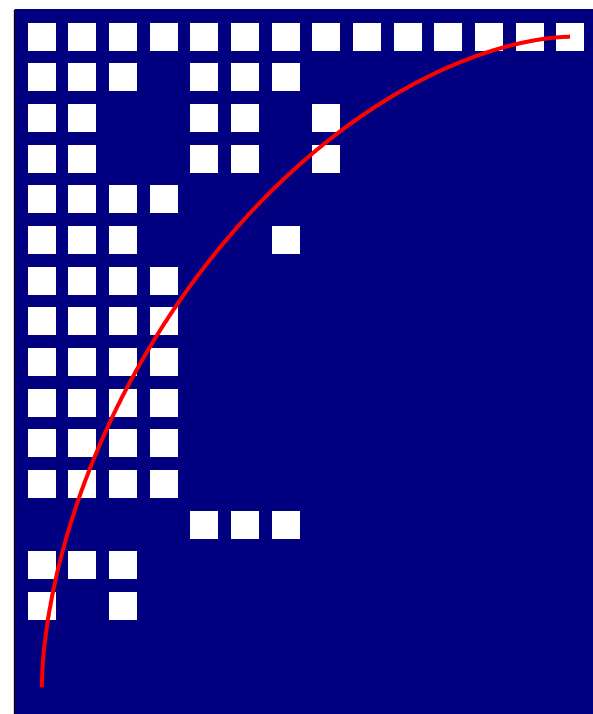

# 31 - Seed 2005

Bacteria

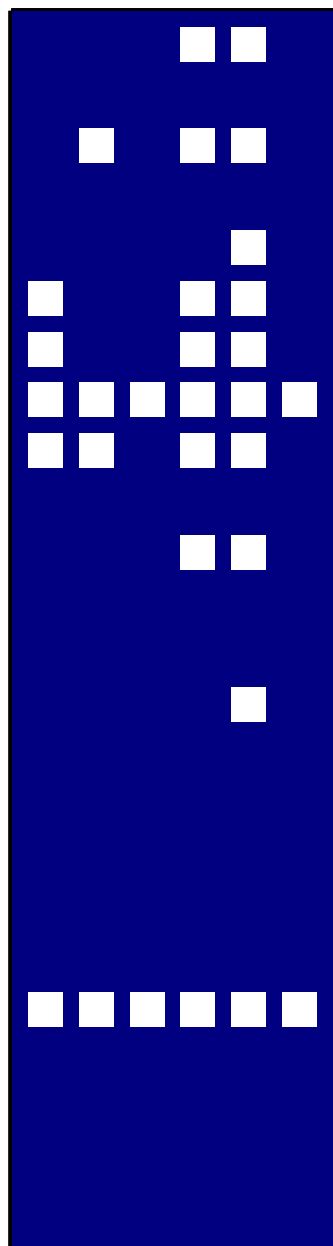

Phages

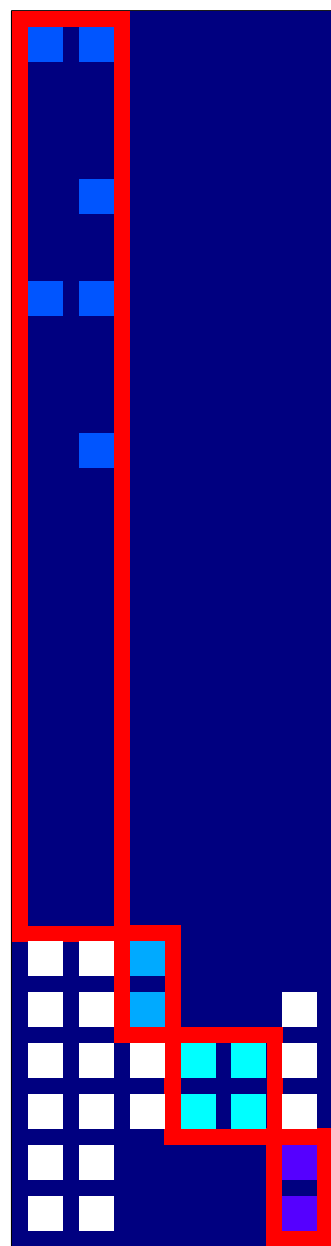

$Q = 0.23$

$z_Q = -5.87$

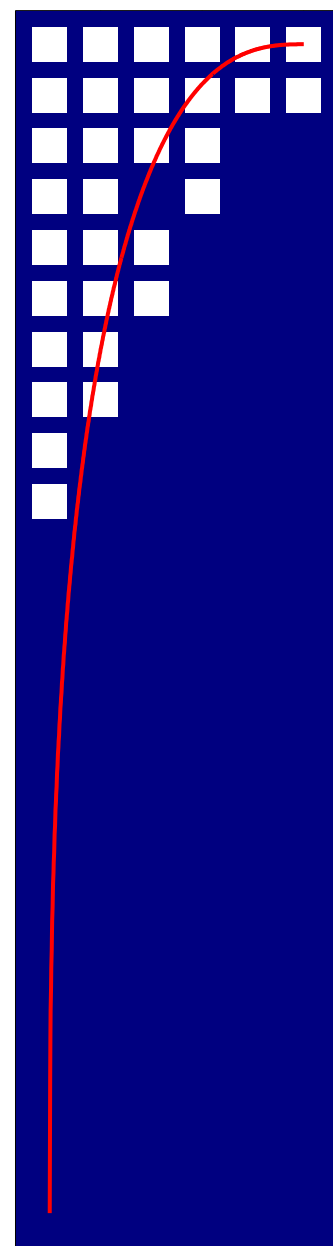

$N = 0.98$

$z_N = 3.65$

# 32 - Stenholm 2009

Bacteria

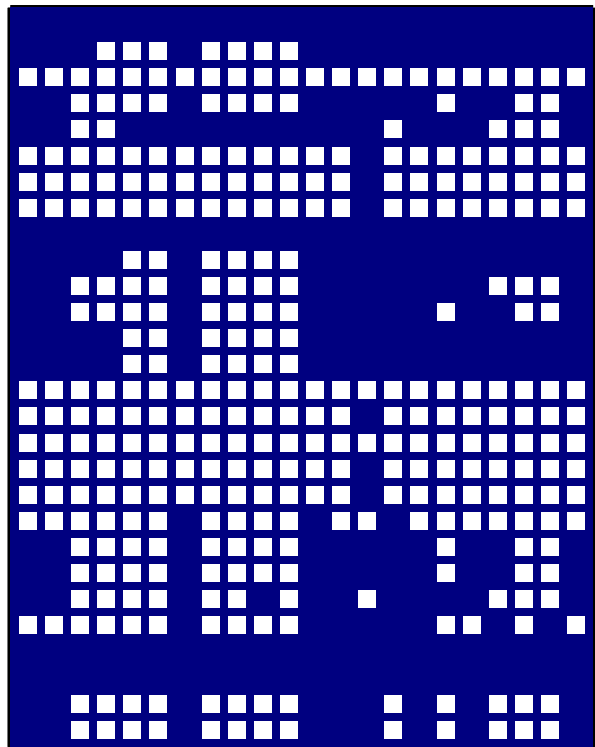

Phages

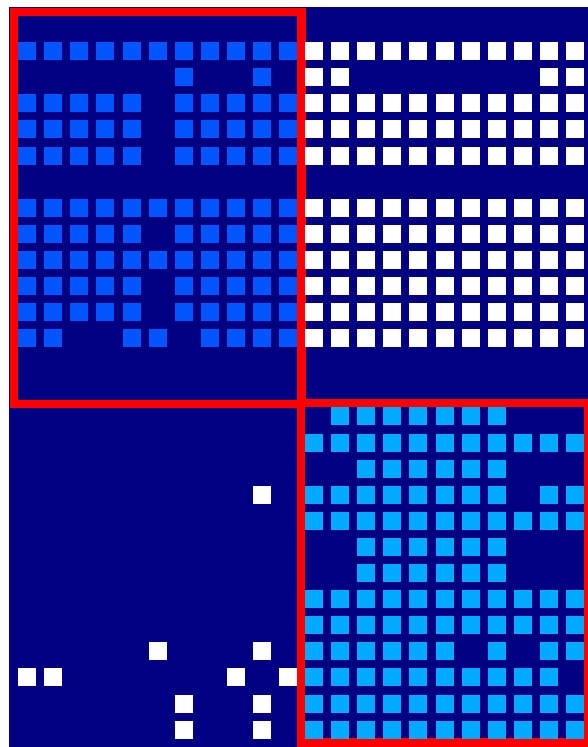

$Q = 0.18$   
 $z_Q = 8.77$

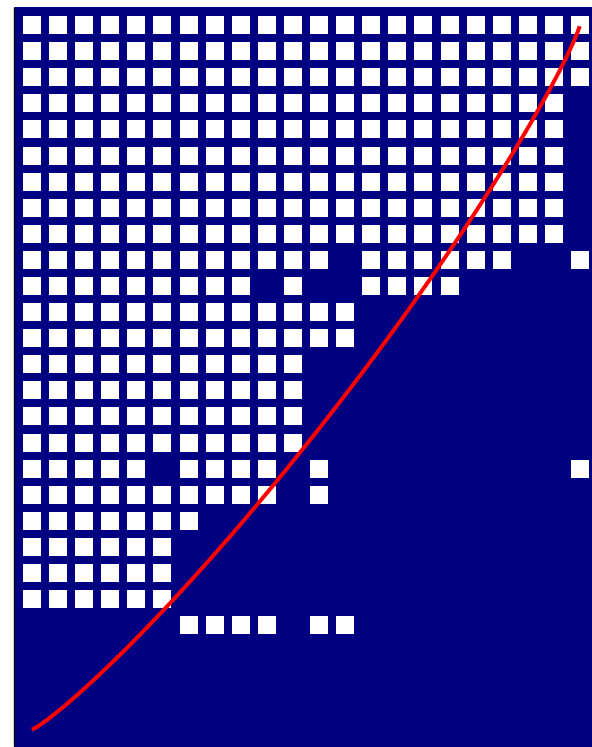

$N = 0.93$   
 $z_N = 15.45$



Bacteria

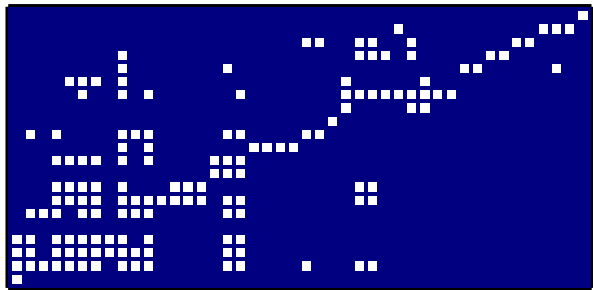

Phages

33 - Sullivan 2003

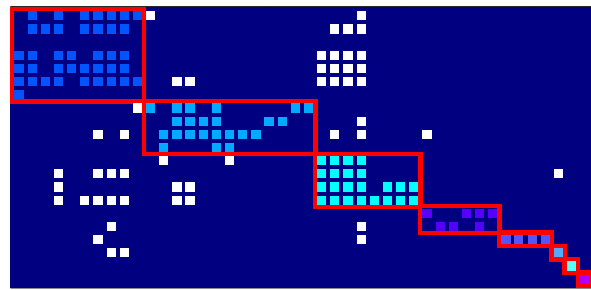

$$Q = 0.39$$

$$z_Q = -0.06$$

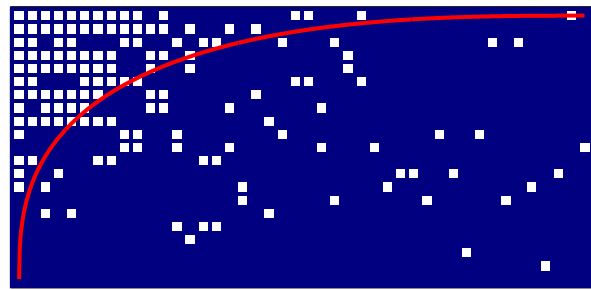

$$N = 0.79$$

$$z_N = 4.81$$



# 35 - Synott 2009

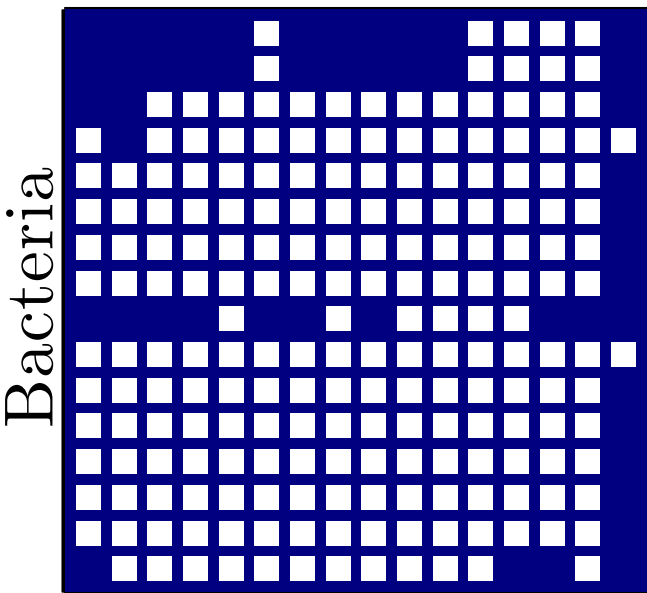

Phages

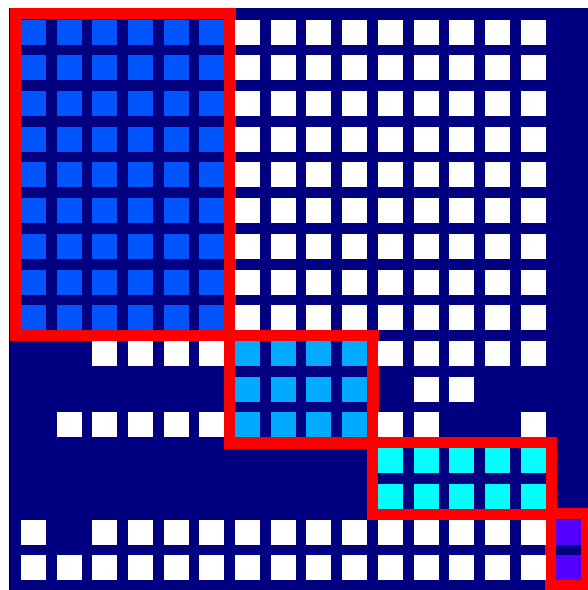

$Q = 0.08$

$z_Q = -0.34$

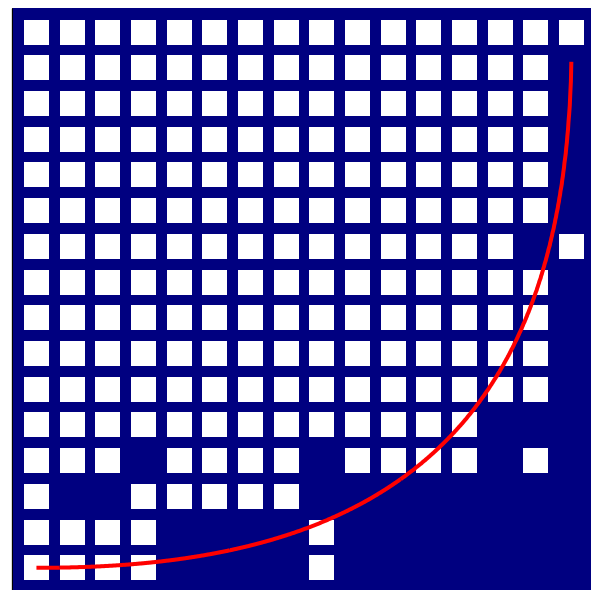

$N = 0.95$

$z_N = 4.13$

# 36 - Wang 2008

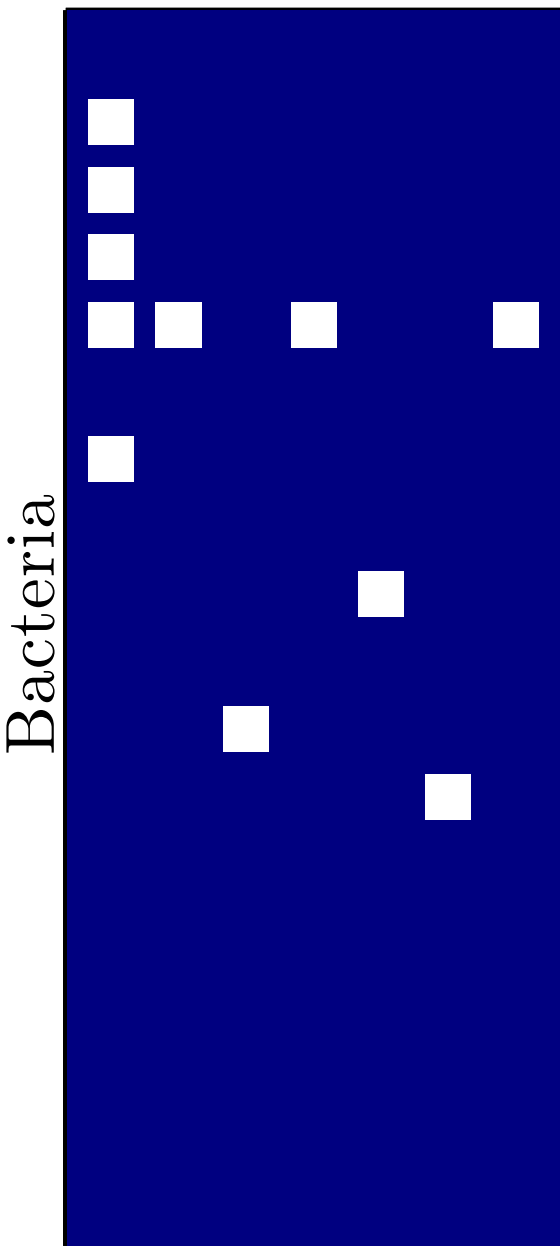

Phages

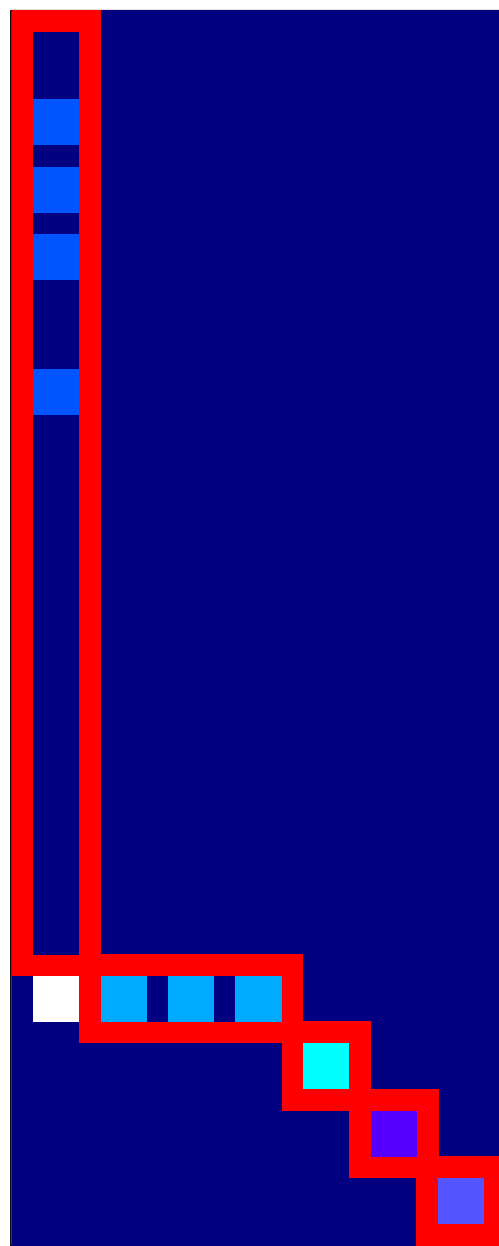

$Q = 0.62$

$z_Q = -0.19$

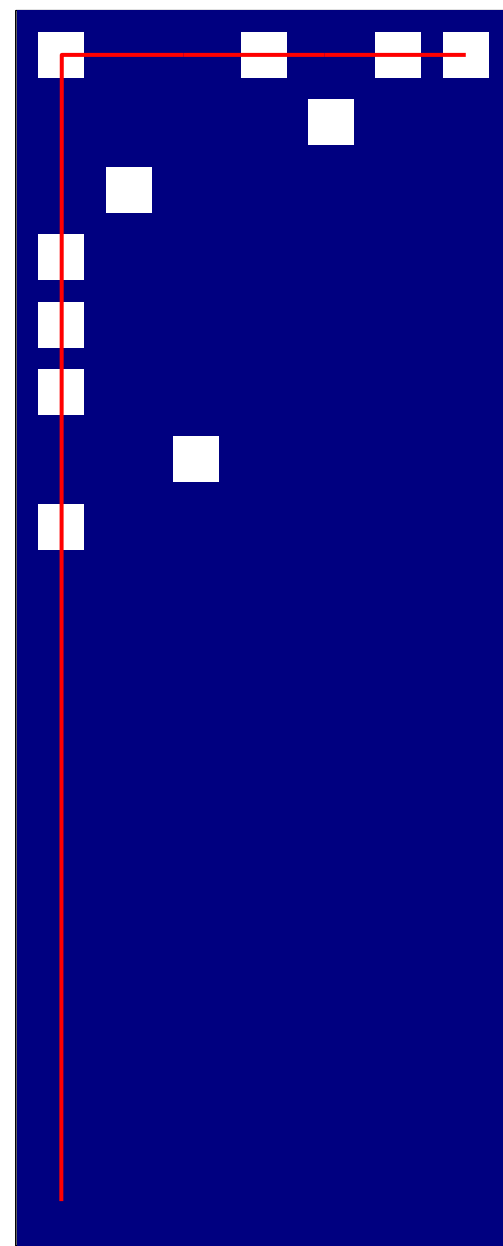

$N = 0.98$

$z_N = 1.11$

# 37 - Wichels 1998

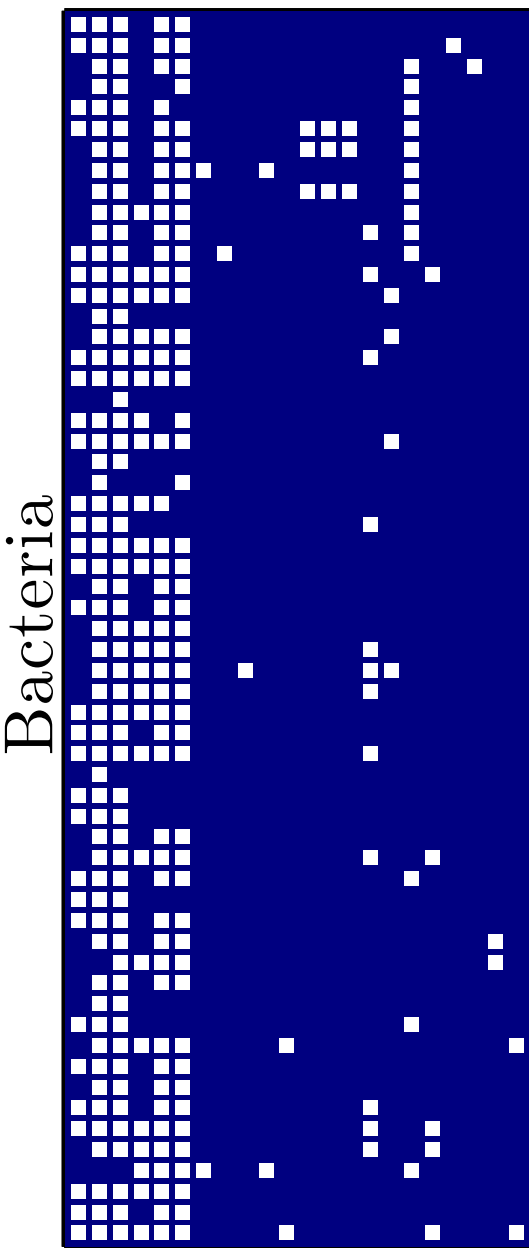

Phages

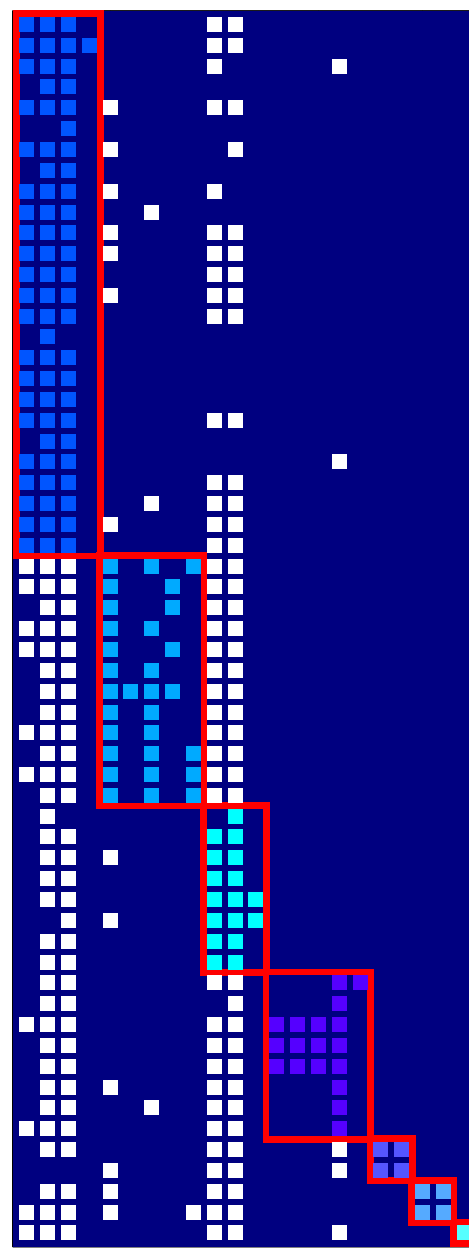

$Q = 0.22$

$z_Q = -7.42$

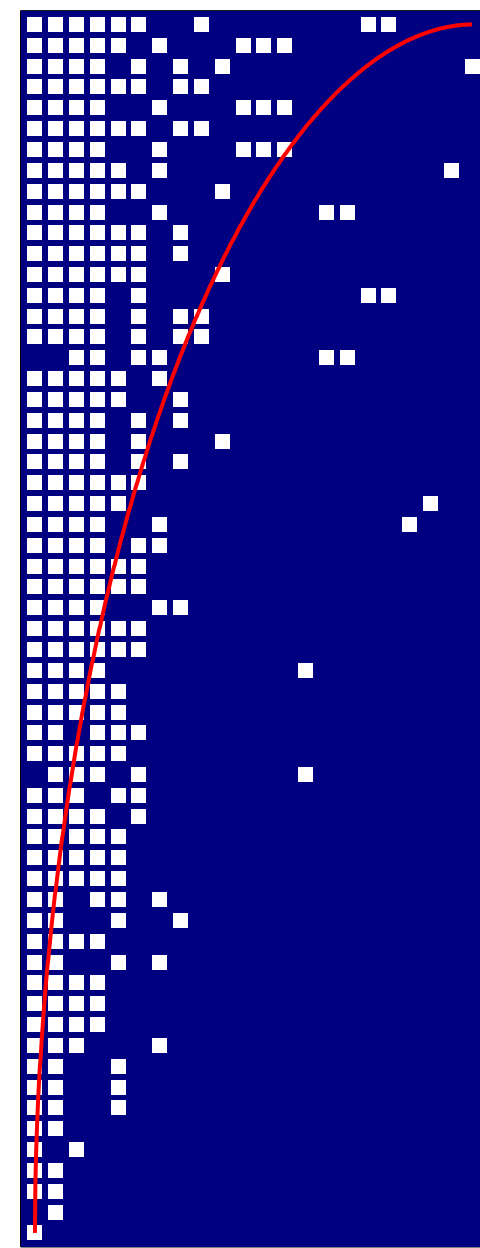

$N = 0.89$

$z_N = 14.44$

# 38 - Zinno 2010

Bacteria

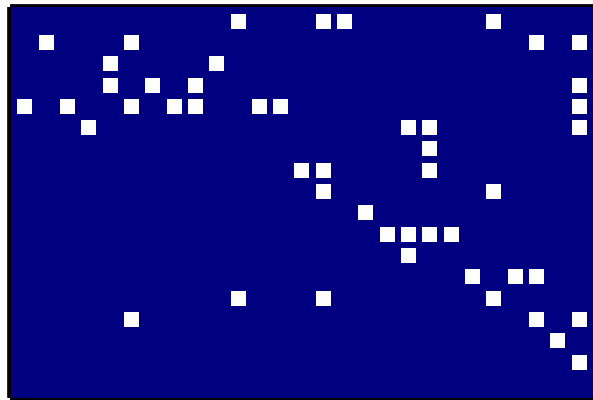

Phages

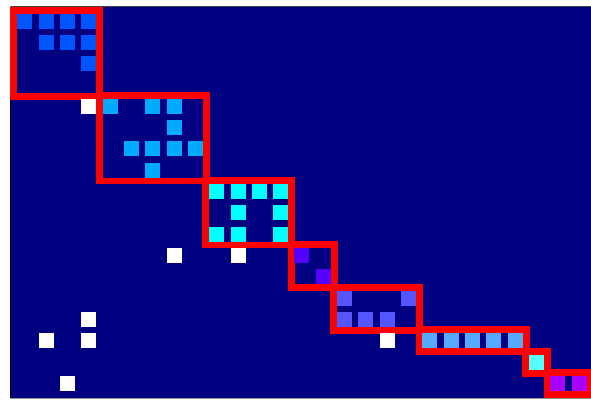

$Q = 0.68$   
 $z_Q = 3.27$

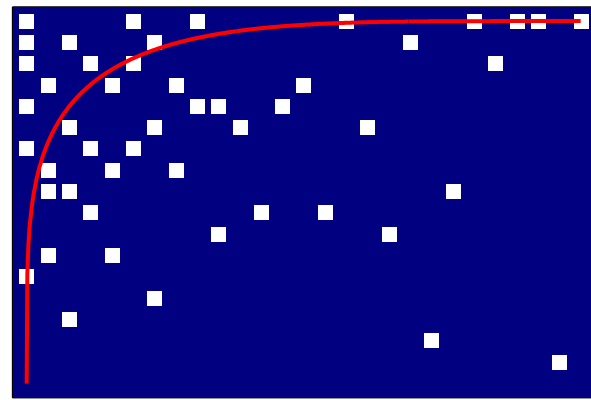

$N = 0.85$   
 $z_N = 0.44$
